# Supplementary material
Source: publisher site journal article supplement (https://www.degruyterbrill.com/publication/dbid/dbe/downloadAsset/DBE_DBE_Literaturverzeichnis.pdf)
Supplement: Supplementary file 1 [file DBE_DBE_Literaturverzeichnis.pdf]

---

## Verzeichnis der abgekürzt zitierten Literatur

### **Ackerl**

Isabella Ackerl/Friedrich Weissensteiner: Österreichisches Personen-Lexikon der ersten und zweiten Republik. Wien 1992.

### **ADB**

Allgemeine Deutsche Biographie. Hrsg. von der Historischen Kommission bei der Königlichen Akademie der Wissenschaften. 55 Bde., Registerband, Leipzig 1875-1912. Nachdr. Berlin 1967-71.

### **Ärzte 1**

Biographisches Lexikon der hervorragenden Ärzte aller Zeiten und Völker. Hrsg. v. August Hirsch. 6 Bde., Berlin/Wien 1929-35.

### **Ärzte 2**

Biographisches Lexikon der hervorragenden Ärzte der letzten fünfzig Jahre: (1880-1930). Hrsg. v. Isidor Fischer. 2 Bde., Berlin 1932/33.

### **Ärzte 3**

Biographisches Lexikon der hervorragenden Ärzte der letzten fünfzig Jahre von Isidor Fischer. Bd. 3: Nachträge und Ergänzungen. Aba-Kom. Bearb. und hrsg. v. Peter Voswinkel. Hildesheim u. a., 2002.

### **Ärzte Schlesien**

Historisches Ärztelexikon für Schlesien. Biographisch-bibliographisches Lexikon schlesischer Ärzte und Wundärzte (Chirurgen). Bearb. v. Michael Sachs. Wunstorf 1997 ff.

### **AGB**

Archiv für Geschichte des Buchwesens. Hrsg. von der Historischen Kommission des Börsenvereins des Deutschen Buchhandels 1 ff. (1958 ff.).

### **AKL**

Allgemeines Künstlerlexikon. Die Bildenden Künstler aller Zeiten und Völker. Hrsg. vom K. G. Saur Verlag. Begründet und mitherausgegeben v. Günter Meißner. München/Leipzig 1992 ff.

### **Alckens**

August Alckens: Münchner Forscher und Erfinder des 19. Jahrhunderts. München 1965.

### **Allg Hann Biogr**

Allgemeine hannoversche Biographie. Hrsg. v. Wilhelm Rothert. 3 Bde., Hannover 1912-16.

### **Almanach Öst Akad**

Almanach der Österreichischen Akademie der Wissenschaften. Jg. 50 ff. Wien 1900 ff.

### **Almquist**

Ernst Almquist: Große Biologen. Eine Geschichte der Biologie und ihrer Erforscher. München 1931.

### **Altöst**

Rudolf Granichstaedten-Cerva/Josef Mentschl/Gustav Otruba: Altösterreichische Unternehmer. 110 Lebensbilder. Wien 1969.

### **Altpreuß Biogr**

Altpreußische Biographie. Hrsg. im Auftrag der Historischen Kommission für ost- und westpreußische Landesforschung. Königsberg [ab Bd. 2: Marburg] 1941 ff.

### **Alzheimer**

Heidrun Alzheimer: Volkskunde in Bayern. Ein biobibliographisches Lexikon der Vorläufer, Förderer und einstigen Fachvetreter. Würzburg 1991.

### **Amelung**

Peter Amelung: Der Frühdruck im deutschen Südwesten. 2 Bde., Stuttgart 1979.

### **Anderl**

Ludwig Anderl: Die roten Kapläne. Vorkämpfer der katholischen Arbeiterbewegung in Bayern und Süddeutschland. München <sup>2</sup>1963.

### **Andresen: Maler**

Andreas Andresen: Die deutschen Maler-Radierer (peintres-graveurs) des 19. Jahrhunderts nach ihrem Leben und Werken. 5 Bde., Leipzig 1866-74.

### **Andresen: Peintre-Graveur**

Andreas Andresen: Der deutsche Peintre-Graveur oder die deutschen Maler als Kupferstecher. Nach ihrem Leben und ihren Werken, von dem letzten Drittel des 16. Jahrhunderts bis zum Schluß des 18. Jahrhunderts. Unter Mitwirkung v. Rud(olf) Weigel. 5 Bde., Leipzig 1864-78.

### **Anglistenlex**

Gunta Haenicke/Thomas Finkenstaedt: Anglistenlexikon 1825-1990. Biographische und bibliographische Angaben zu 318 Anglisten. Augsburg 1992.

### **Arbeiterbewegung**

Geschichte der deutschen Arbeiterbewegung. Biographisches Lexikon. Hrsg. vom Institut für Marxismus-Leninismus beim ZK der SED. Berlin 1970.

### **Architects**

Muriel Emanuel (Hrsg.): Contemporary Architects. New York u. a. <sup>3</sup>1994.

### **Arnsberg**

Paul Arnsberg: Die Geschichte der Frankfurter Juden seit der Französischen Revolution. Bd. 3: Biographisches Lexikon der Juden in den Bereichen Wissenschaft, Kultur, Bildung, Öffentlichkeitsarbeit in Frankfurt am Main. Darmstadt 1983.

### **Arps**

Ludwig Arps: Deutsche Versicherungsunternehmer. Karlsruhe 1968.

### **Asimov**

Isaac Asimov: Biographische Enzyklopädie der Naturwissenschaften und der Technik. 1151 Biographien mit 246 Porträts. Freiburg u. a. 1973.

### **Astronomen Bonn**

Hans Schmidt: Astronomen der Rheinischen Friedrich-Wilhelms-Universität Bonn. Ihr Leben und Werk 1819-1966. Bonn 1990.

## Verzeichnis der abgekürzt zitierten Literatur

---

### **Aufklärung**

Rudolf Vierhaus/Hans Erich Bödeker (Hrsg.): Biographische Enzyklopädie der deutschsprachigen Aufklärung. München 2002.

### **Baader: Baiern**

Klement Alois Baader: Das gelehrte Baiern oder Lexikon aller Schriftsteller, welche Baiern im 18. Jahrhunderte erzeugte oder ernährte. Bd. 1 [A-K]. Nürnberg/Sulzbach 1804.

### **Baader: Verstorb**

Klement Alois Baader: Lexikon verstorbener bayerischer Schriftsteller des 18. und 19. Jahrhunderts. 2 Bde., Augsburg/Leipzig 1824/25.

### **Bad Bio**

Badische Biographien. Bd. 1-5. Hrsg. v. Friedrich von Weech. Bd. 6. Hrsg. v. Albert Krieger und Karl Obser. Heidelberg/Karlsruhe 1875-1906, 1935.

### **Bad Bio N.F.**

Badische Biographien. Neue Folge. Hrsg. v. Bernd Ott. Stuttgart 1982 ff.

### **Bader**

Karl Bader: Lexikon deutscher Bibliothekare im Haupt- und Nebenamt bei Fürsten, Staaten und Städten. Leipzig 1925.

### **Bächi**

Julius Bächi: Berühmte Cellisten. Porträts der Meistercellisten von Boccherini bis zur Gegenwart. Schweizer Cellisten von heute. 4., überarb. und erw. Aufl. Zürich 1987.

### **Baldinger**

Ernst Gottfried Baldinger: Biographien jetztlebender Ärzte und Naturforscher in und außer Deutschland. 1 Bd. in 4 Stücken. Jena 1768-71.

### **Banse**

Ewald Banse: Große Forschungsreisende. Ein Buch von Abenteurern, Entdeckern und Gelehrten. München 1933.

### **Baumeister**

Baumeister, Architekten, Stadtplaner. Biographien zur baulichen Entwicklung Berlins. Hrsg. v. Wolfgang Ribbe und Wolfgang Schäche. Berlin 1987.

### **Baur**

Samuel Baur: Allgemeines historisches Handwörterbuch aller merkwürdigen Personen, die in dem letzten Jahrzehend des 18. Jahrhunderts gestorben sind. Ulm 1803.

### **Bavarias Töchter**

Marita A. Panzer/Elisabeth Plöbl: Bavarias Töchter. Regensburg 1997.

### **Bayer Senat**

Der Bayerische Senat. Biographisch-statistisches Handbuch 1947-1997. Bearb. v. Helga Schmöger. Düsseldorf 1998.

### **BBHS**

Bio-bibliographisches Handbuch zur Sprachwissenschaft des 18. Jahrhunderts. Die Grammatiker, Lexikographen und Sprachtheoretiker des deutschsprachigen Raums mit Beschreibungen ihrer Werke. Hrsg. v. Herbert E. Brekle, Edeltraud Dobnig-Jülch, Hans Jürgen Höller und Helmut Weiß. 8 Bde., Tübingen 1992-2005.

### **BBKL**

Biographisch-bibliographisches Kirchenlexikon. Begründet und hrsg. v. Friedrich Wilhelm Bautz. Fortgeführt v. Traugott Bautz. Hamm (später Herzberg, Nordhausen) 1970 ff.

### **BBL**

Brandenburgisches Biographisches Lexikon. Hrsg. v. Friedrich Beck, Eckart Henning u. a. Berlin 2002.

### **Beck 1**

Hanno Beck: Große Geographen. Pioniere, Außenseiter, Gelehrte. Berlin 1982.

### **Beck 2**

Hanno Beck: Große Reise. Entdecker und Erforscher unserer Welt. München 1971.

### **BEDPh**

Biographische Enzyklopädie deutschsprachiger Philosophen. Bearb. v. Bruno Jahn. München 2001.

### **Beier**

Gerhard Beier: Schulter an Schulter, Schritt für Schritt. Lebensläufe deutscher Gewerkschafter. Von August Bebel bis Theodor Thomas. Köln 1983.

### **Benzing: Buchdrucker**

Josef Benzing: Die Buchdrucker des 16. und 17. Jahrhunderts im deutschen Sprachgebiet. 2., verb. und erg. Aufl. Wiesbaden 1982.

### **Benzing: Verleger**

Josef Benzing: Die deutschen Verleger des 16. und 17. Jahrhunderts. In: Archiv für Geschichte des Buchwesens 2 (1960) S. 445-509.

### **Berlin-Cölln 1**

Lothar Noack/Jürgen Splett: Bio-Bibliographien. Brandenburgische Gelehrte der Frühen Neuzeit Berlin-Cölln 1640-1688. Berlin 1997.

### **Berlin-Cölln 2**

Lothar Noack/Jürgen Splett: Bio-Bibliographien. Brandenburgische Gelehrte der Frühen Neuzeit Berlin-Cölln 1688-1713. Berlin 2000.

### **Bern Bio**

Sammlung bernischer Biographien. 5 Bde., Bern 1884-1906.

### **Bernecker**

Persönlichkeit und Politik in der BRD. Politische Porträts. Hrsg. v. Walther L. Bernecker und Volker Dotterweich. 2 Bde., Göttingen 1982.

### **Beyer**

Große Deutsche im Ausland. Hrsg. v. Hans Joachim Beyer und Otto Lohr. Stuttgart 1939.

### **BHdAD**

Biographisches Handbuch des deutschen Auswärtigen Dienstes 1871-1945. Hrsg.: Auswärtiges Amt, Historischer Dienst; Maria Keipert, Peter Grupp. Paderborn u. a. 2000 ff.

### **BHdE**

Biographisches Handbuch der deutschsprachigen Emigration nach 1933/International Biographical Dictionary of Central European Emigrés 1933-1945. Hrsg. vom Institut für Zeitgeschichte München und von der Research Foundation for Jewish Immigration. Unter der Gesamtleitung v. Werner Röder und Herbert A. Strauss. 2 Bde. in 3 Teilen, Gesamtregister, München u. a. 1980-83.

### **BHdP**

Biographisches Handbuch der deutschen Politik, Bearb. v. Bruno Jahn. 2 Bde., München 2004.

## Verzeichnis der abgekürzt zitierten Literatur

### **BHE**

Biographisches Handwörterbuch der Erwachsenenbildung. Erwachsenenbildner des 19. und 20. Jahrhunderts. Hrsg. v. Günther Wolgast und Joachim H. Knoll. Stuttgart, Bonn 1986.

### **BHöP**

Biographisches Handbuch des österreichischen Parlaments 1918-1998. Hrsg. von der Parlamentsdirektion. Wien 1998 (siehe auch <http://www.parlament.gv.at>).

### **BHR**

Biographisches Handbuch der Reichsrätekongresse 1918/19. Bearb. v. Sabine Roß. Düsseldorf 2000.

### **Biermann**

Kurt-R. Biermann: Die Mathematik und ihre Dozenten an der Berliner Universität 1810-1933. Stationen auf dem Wege eines mathematischen Zentrums von Weltgeltung. Berlin 1988.

### **Biogr bed Dortmunder**

Biographien bedeutender Dortmunder. Menschen in, aus und für Dortmund. Im Auftrag des Historischen Vereins für Dortmund und die Grafschaft Mark e.V. hrsg. v. Hans Bohrmann. 3 Bde., Dortmund 1994-2001.

### **Biogr Jahrb**

Biographisches Jahrbuch und deutscher Nekrolog. Hrsg. v. Bruno Bettelheim. Jg. 1-18. Berlin 1897-13.

### **Biogr Lex Aargau**

Biographisches Lexikon des Aargaus 1803-1957. Hrsg. v. Otto Mittler und Georg Boner. Aarau 1958.

### **Biogr Lex Banat**

Adam Peter Petri: Biographisches Lexikon des Banat Deutschtums. Marquartstein 1992.

### **Biogr Lex Böhmen**

Biographisches Lexikon zur Geschichte der böhmischen Länder. Hrsg. v. Ferdinand Seibt. 4 Bde., München 1979-2003.

### **Biogr Lex KV**

Siegfried Koß/Wolfgang Löhr (Hrsg.): Biographisches Lexikon des KV. 6 Tle., Schernfeld 1991-2000.

### **Biogr Lex Oberöst**

Biographisches Lexikon von Oberösterreich. Bearb. v. Martha Khil. Hrsg. v. Institut für Landeskunde. 9 Tle., Linz 1955-68.

### **Biogr Verstorb Schweiz**

Biographisches Lexikon verstorbener Schweizer. In memoriam. Bd. 1-8. Basel 1947-82.

### **Bischöfe Basel**

Urban Fink (Hrsg.): Die Bischöfe von Basel 1794-1995. 2., durchges. und korrigierte Aufl. Freiburg, Schweiz 1996.

### **Bleibrunner**

Große Niederbayern. Zwölf Lebensbilder. Hrsg. v. Hans Bleibrunner. Passau 1972.

### **BLGbL**

Biographisches Lexikon zur Geschichte der böhmischen Länder. Hrsg. v. Ferdinand Seibt, Heribert Sturm u.a. München 1979 ff.

### **BLW**

Biographisches Lexikon zur Weimarer Republik. Hrsg. v. Wolfgang Benz und Hermann Graml. München 1988.

### **Böhm**

Wolfgang Böhm: Biographisches Handbuch zur Geschichte des Pflanzenbaus. München 1997.

### **Börner**

Friedrich Börner: Nachrichten von den vornehmsten Lebensumständen und Schriften jetzt lebender Ärzte in und um Deutschland. 3 Bde. [nebst] Ergänzung. Wolfenbüttel 1749-73.

### **Böttcher**

Lexikon deutschsprachiger Schriftsteller. 20. Jahrhundert. Hrsg. v. Kurt Böttcher u. a. = Lexikon deutschsprachiger Schriftsteller. Von den Anfängen bis zur Gegenwart. Bd. 2. Hildesheim, Zürich, New York 1993.

### **Bonn 1**

Bonner Gelehrte. Beiträge zur Geschichte der Wissenschaften in Bonn. Bd. 1: Evangelische Theologie. = 150 Jahre Rheinische Friedrich-Wilhelms-Universität zu Bonn 1818-1968. Bd. 2,1. Bonn 1968.

### **Bonn 2**

Bonner Gelehrte. Beiträge zur Geschichte der Wissenschaften in Bonn. Bd. 2: Katholische Theologie = 150 Jahre Rheinische Friedrich-Wilhelm-Universität zu Bonn 1818-1968. Bd. 2,2. Bonn 1968.

### **Bonn 3**

Bonner Gelehrte. Beiträge zur Geschichte der Wissenschaften in Bonn. Bd. 3: Staatswissenschaften = 150 Jahre Rheinische Friedrich-Wilhelms-Universität zu Bonn 1818-1968. Bd. 2,3. Bonn 1969.

### **Bonn 4**

Bonner Gelehrte. Beiträge zur Geschichte der Wissenschaften in Bonn. Bd. 4: Philosophie und Altertumswissenschaften = 150 Jahre Rheinische Friedrich-Wilhelms-Universität zu Bonn 1818-1968. Bd. 2,4. Bonn 1968.

### **Bonn 5**

Bonner Gelehrte. Beiträge zur Geschichte der Wissenschaften in Bonn. Bd. 5: Geschichtswissenschaften = 150 Jahre Rheinische Friedrich-Wilhelms-Universität zu Bonn 1818-1968. Bd. 2,5. Bonn 1968.

### **Bonn 6**

Bonner Gelehrte. Beiträge zur Geschichte der Wissenschaften in Bonn. Bd. 6: Landwirtschaftswissenschaften = 150 Jahre Rheinische-Friedrich-Wilhelms-Universität zu Bonn 1818-1968. Bd. 2,6. Bonn 1971.

### **Bonn 8**

Bonner Gelehrte. Beiträge zur Geschichte der Wissenschaften in Bonn. Bd. 8: Mathematik und Naturwissenschaften = 150 Jahre Rheinische Friedrich-Wilhelms-Universität zu Bonn 1818-1968. Bd. 2,8. Bonn 1970.

### **Bosse**

Baltische Köpfe. 24 Lebensbilder aus acht Jahrhunderten deutschen Wirkens in baltischen Landen. Hrsg. v. Heinrich Bosse und Arved Frh. von Taube. Bovenden 1953.

### **Braune Elite 1**

Die braune Elite. 22 biographische Skizzen. Hrsg. v. Romuald Smelser und Rainer Zitlmann. Darmstadt 1989.

### **Braune Elite 2**

Die braune Elite II. 21 weitere biographische Skizzen. Hrsg. v. Romuald Smelser und Rainer Zitlmann. Darmstadt 1993.

### **Brauneder**

Juristen in Österreich 1200-1980. Hrsg. v. Wilhelm Brauneder. Wien 1987.

## Verzeichnis der abgekürzt zitierten Literatur

---

### **Braunschweig 1**

Braunschweigisches Biographisches Lexikon. 8. bis 18. Jahrhundert. Hrsg. v. Horst-Rüdiger Jarck u. a. Braunschweig 2006.

### **Braunschweig 2**

Braunschweigisches Biographisches Lexikon. 19. und 20. Jahrhundert. Hrsg. v. Horst-Rüdiger Jarck und Günter Scheel. Hannover 1996.

### **Breitner**

Beiträge zur österreichischen Musik der Gegenwart. Dokumente zu Leben und Werk zeitgenössischer Komponisten. Bearb. v. Karin Breitner u. a. Tutzing 1992.

### **Brem Bio 1**

Bremische Biographie des 19. Jahrhunderts. Hrsg. von der Historischen Gesellschaft des Künstlervereins. Bremen 1912.

### **Brem Bio 2**

Bremische Biographie 1912-1962. Bearb. v. Wilhelm Lührs. Bremen 1969.

### **Bremerhaven**

Hartmut Bickelmann (Hrsg.): Bremerhavener Persönlichkeiten aus vier Jahrhunderten. Ein biographisches Lexikon. 2., erw. und korr. Aufl. Bremerhaven 2003.

### **Brinker-Gabler 1**

Deutsche Dichterinnen vom 16. Jahrhundert bis zur Gegenwart. Hrsg. v. Gisela Brinker-Gabler. Frankfurt/Main 1978.

### **Brinker-Gabler 2**

Gisela Brinker-Gabler/Karola Ludwig/Angela Wöffen: Lexikon deutschsprachiger Schriftstellerinnen 1800-1945. München 1986.

### **Brischar**

Johann Nepomuk Brischar: Die katholischen Kanzelredner Deutschlands seit den drei letzten Jahrhunderten. Als Beitrag zur Geschichte der deutschen Kanzelberedsamkeit, sowie als Material zur praktischen Benützung für Prediger. 5 Bde., Schaffhausen 1867-71.

### **Bromberg**

Thomas Gey: Die preußische Verwaltung des Regierungsbezirks Bromberg 1871-1920. Köln/Berlin 1976.

### **Brun**

Schweizerisches Künstler-Lexikon. Hrsg. v. Carl Brun. 4 Bde., Frauenfeld 1905-17.

### **Buchkunst**

Gunter Quarg/Wolfgang Schmitz: Deutsche Buchkunst im 20. Jahrhundert. Katalog zur Ausstellung anlässlich des 75jährigen Bestehens der Universitäts- und Stadtbibliothek Köln vom 19. Juni bis 5. August 1995. Köln 1995.

### **Buck**

Friedrich Johann Buck: Lebensbeschreibungen der verstorbenen preußischen Mathematiker überhaupt und des vor mehr denn hundert Jahren verstorbenen großen Preußischen Mathematikers P. Christian Otters insbesondere. Königsberg/Leipzig 1764.

### **Budke**

Petra Budke/Jutta Schulze: Schriftstellerinnen in Berlin 1871 bis 1945. Ein Lexikon zu Leben und Werk. Berlin 1995.

### **Burg**

Paul Burg: Forscher, Kaufherrn und Soldaten. Deutschlands Bahnbrecher in Afrika in kurzen Lebensbildern dargestellt. Leipzig 1936.

### **Burschenschaft**

Helge Dvorak: Biographisches Lexikon der Deutschen Burschenschaft. Im Auftrag der Gesellschaft für Burschenschaftliche Geschichtsforschung e. V. (GfbG) hrsg. v. Christian Hünemörder. 6 Bde., Heidelberg 1996 ff.

### **Bursian**

Biographisches Jahrbuch für die Altertumswissenschaften. (Jg. 56 ff: Jahresbericht über die Fortschritte der klassischen Altertumswissenschaften. 4. Abt.: Nekrologe). Hrsg. v. Conrad Bursian. Jg. 1-70. Berlin/Leipzig 1878-1944.

### **BWB**

Baden-Württembergische Biographien. Im Auftrag der Kommission für Geschichtliche Landeskunde in Baden-Württemberg hrsg. v. Bernd Ottnad. Stuttgart 1994 ff.

### **Casdorff**

Demokraten. Profile unserer Republik. Hrsg. v. Claus Hinrich Casdorff. Königstein/Taunus 1983.

### **Cat Prof Hal**

<http://www.catalogus-professorum-halensis.de>

### **Cat Prof Marb**

Catalogus Professorum Academiae Marburgensis. Die akademischen Lehrer der Philipps-Universität in Marburg. Bd. 2: Von 1911 bis 1971. Bearb. v. Inge Auerbach. Marburg 1979.

### **Ceramic Arts**

Who's who in contemporary ceramic arts. A comprehensive bio-bibliographical guide to Austria, Germany, Switzerland. München 1996.

### **CH 91**

Schweizer Lexikon 91 in 6 Bänden. Luzern 1991/92.

### **Christl Demokr**

Christliche Demokraten gegen Hitler. Aus Verfolgung und Widerstand zur Union. Hrsg. v. Günter Buchstab, Brigitte Kaff und Hans-Otto Kleinmann. Freiburg/Breisgau u. a. 2004.

### **Christl Phil**

Christliche Philosophie im katholischen Denken des 19. und 20. Jahrhunderts. Hrsg. v. Emerich Coreth, Walter M. Neidl und Georg Pfligersdorffer. 3 Bde., Graz u. a. 1987-90.

### **Christoph**

Sie gehören zu uns. Von Glatzer Heimatpriestern. Hrsg. v. Leo Christoph. Reinbek 1969.

### **Cinegraph**

Cinegraph. Lexikon zum deutschsprachigen Film. Hrsg. v. Hans-Michael Bock. Loseblatt-Ausgabe. München 1984 ff.

### **Coesfeld**

Erwin Dickhof: Coesfelder Biographien. Münster 2002.

### **Czeike**

Felix Czeike: Historisches Lexikon Wien in 6 Bänden. Wien 1992-2004.

### **Dawson**

Warren Royal Dawson/Eric Parrington Uphill: Who was who in Egyptology. 2., rev. ed. London 1972.

### **DBJ**

Deutsches Biographisches Jahrbuch. Hrsg. v. Hermann Christern. Überleitungsband 1-2. Bd. 3-5 und 10-11. Berlin 1914 (1925)-1929 (1932).

## Verzeichnis der abgekürzt zitierten Literatur

### DDR

Wer war wer in der DDR? Ein Lexikon ostdeutscher Biographien. Hrsg. v. Helmut Müller-Enbergs, Jan Wielgoß, Dieter Hoffmann und Andreas Herbst. Unter Mitarbeit v. Olaf W. Reimann. 4., durchgesehene und aktualisierte Aufl. Berlin 2006.

### DDR-Historiker

Lothar Mertens: Lexikon der DDR-Historiker. München 2006.

### Degener

Wer ist's? Unsere Zeitgenossen, enthaltend Biographien und Bibliographien. Zusammengestellt v. Hermann A. L. Degener [teilweise unter dem Titel: Wer ist's? Unsere Zeitgenossen, 10. Ausgabe unter dem Titel: Degeners Wer ist's? Begr. und hrsg. v. Herrmann A. L. Degener]. 10 Ausgaben, Berlin/Leipzig 1905-35.

### Deichmann 1

Ute Deichmann: Biologen unter Hitler. Vertreibung, Karrieren, Forschung. Frankfurt/Main, New York 1992.

### Deichmann 2

Ute Deichmann: Flüchten, Mitmachen, Vergessen. Chemiker und Biochemiker in der NS-Zeit. Weinheim u. a. 2001.

### Demokr Wege

Demokratische Wege. Deutsche Lebensläufe aus fünf Jahrhunderten. Hrsg. v. Manfred Asendorf und Rolf von Bockel. Stuttgart/Weimar 1997.

### Designers

Sara Pendergast (Hrsg.): Contemporary Designers. Detroit u. a. <sup>3</sup>1997.

### Deutschbalt biogr Lex

Deutschbaltisches biographisches Lexikon 1710-1960. Im Auftrage der Baltischen Historischen Kommission begonnen v. Olaf Welding (†) und unter Mitarbeit v. Erik Amburger und Georg von Krusenstjern hrsg. v. Wilhelm Lenz. Nachdr. Wedemark 1998 (erste Aufl. Köln 1970).

### Deutsche Buch

Deutsche Buchhändler: 24 Lebensbilder führender Männer des Buchhandels. Hrsg. v. Gerhard Menz. Leipzig/Stuttgart 1925.

### Deutsche Irr

Deutsche Irrenärzte. Einzelbilder ihres Lebens und Wirkens. Hrsg. v. Theodor Kirchhoff. 2 Bde., Berlin 1921-24.

### Deutsche Presseverl

Deutsche Presseverleger des 18. bis 20. Jahrhunderts. Hrsg. v. Heinz-Dietrich Fischer. Pullach 1975.

### Dichterärzte

Wilhelm Theopold: Doktor und Poet dazu. Dichterärzte aus sechs Jahrhunderten. 2. Aufl. Mainz 1987.

### Dick

Jüdische Frauen im 19. und 20. Jahrhundert. Lexikon zu Leben und Werk. Hrsg. v. Jutta Dick und Marina Sassenberg. Reinbek bei Hamburg 1993.

### Dickmann

Barrieren und Karrieren. Die Anfänge des Frauenstudiums in Deutschland. Dokumentationsband der Konferenz "100 Jahre Frauen in der Wissenschaft" im Februar 1997 an der Universität Bremen. Hrsg. v. Elisabeth Dickmann und Eva Schöck-Quinteros unter Mitarbeit von Sigrid Dauks. Berlin <sup>2</sup>2002.

### Dict Art

The Dictionary of Art. Ed. by Jane Turner. 34 Bde., London/New York 1996.

### Diestelkamp

Juristen an der Universität Frankfurt am Main. Hrsg. v. Bernhard Diestelkamp und Michael Stolleis. Baden-Baden 1989.

### Dilly

Altmeister moderner Kunstgeschichte. Hrsg. v. Heinrich Dilly. Berlin 1990.

### Dippold

Günter Dippold: Staffelsteiner Lebensbilder. Zur 1200-Jahrfeier der Stadt Staffelstein. Staffelstein 2000.

### DLL

Deutsches Literatur-Lexikon. Biographisch-bibliographisches Handbuch. Begr. v. Wilhelm Kosch. 2., vollständig neu bearb. und stark erw. Aufl. 4 Bde., Bern 1949-58. 3., völlig neu bearb. Aufl. Hrsg. v. Bruno Berger und Heinz Rupp. Ab Bd. 6. hrsg. v. Carl Ludwig Lang und Heinz Rupp. Ab Bd. 16 hrsg. v. Hubert Herkommer und Carl Ludwig Lang. Ab Bd. 20 hrsg. v. Hubert Herkommer und Konrad Feilchenfeldt. Bern/München 1968 ff. 6 Erg.-Bde., hrsg. v. Hubert Herkommer und Carl Ludwig Lang. Bern/München 1994-98.

### DLL, 20. Jh.

Biographisches-bibliographisches Handbuch. Begr. v. Wilhelm Kosch. Hrsg. v. Carl-Ludwig Lang, ab Bd. 2 v. Konrad Feilchenfeldt. München/Bern 2000 ff.

### Doderer

Klaus Doderer (Hrsg.): Lexikon der Kinder- und Jugendliteratur. 3 Bde. und Erg.-Bd. Weinheim u. a. 1975-82.

### Döring: Kanzelredner

Heinrich Johann Michael Döring: Die deutschen Kanzelredner des 18. und 19. Jahrhunderts. Nach ihrem Leben und Wirken dargestellt. Neustadt/Orla 1830.

### Döring: Theol

Heinrich Johann Michael Döring: Die gelehrten Theologen Deutschlands im 18. und 19. Jahrhundert. Nach ihrem Leben und Wirken dargestellt. 4 Bde., Neustadt/Orla 1831-35.

### DSB

Dictionary of Scientific Biography. Ed. by Charles C. Gillispie. 16 Bde. Suppl.-Bde. 17-18. hrsg. v. Frederic L. Holmes. New York 1970-90.

### DSL

Deutsches Schriftsteller-Lexikon 1830-1880. Goedeke Grundriß zur Geschichte der deutschen Dichtung. Fortsetzung. Hrsg. von der Berlin-Brandenburgischen Akademie der Wissenschaften. Bearb. v. Herbert Jacob. Berlin 1995 ff.

### Dt Dichter 17. Jh.

Deutsche Dichter des 17. Jahrhunderts. Ihr Leben und Werk. Hrsg. v. Harald Steinhagen und Benno von Wiese. Berlin 1984.

### Dt jüd Architekten

Myra Warhaftig: Deutsche jüdische Architekten vor und nach 1933 - Das Lexikon. 500 Biographien. Berlin 2005.

### Dt Kommunisten

Hermann Weber/Andreas Herbst: Deutsche Kommunisten. Biographisches Handbuch 1918 bis 1945. Berlin 2004.

### Dt Künstlerinnen

Ulrika Evers: Deutsche Künstlerinnen des 20. Jahrhunderts. Malerei, Bildhauerei, Tapisserie. Hamburg 1983.

## Verzeichnis der abgekürzt zitierten Literatur

---

### **Dt Musikkultur**

Lexikon zur deutschen Musikkultur. Böhmen, Mähren, Sudetenschlesien. Hrsg. vom Sudetendeutschen Musikinstitut. 2 Bde., München 2000.

### **Dt Presse**

Bruno Jahn (Bearb.): Die deutschsprachige Presse. Ein biographisch-bibliographisches Handbuch. 2 Bde., München 2005.

### **Eberl/Marcon**

150 Jahre Promotion an der Wirtschaftswissenschaftlichen Fakultät der Universität Tübingen. Biographien der Doktoren, Ehrendoktoren und Habilitierten 1830-1980 (1984). Bearb. v. Immo Eberl und Helmut Marcon. Stuttgart 1984.

### **Eberle**

Henrik Eberle: Die Martin-Luther-Universität in der Zeit des Nationalsozialismus 1933-1945. Halle 2002.

### **Egerländer**

Egerländer Biografisches Lexikon. Mit ausgewählten Personen aus dem ehemaligen Reg.-Bez. Eger. Bearb. und hrsg. v. Josef Weinmann. 3 Bde., Bayreuth 1985-2005.

### **Ehlert/Wagner**

Genosse General! Die Militärelite der DDR in biografischen Skizzen. Hrsg. v. Hans Ehlert und Armin Wagner. Berlin 2003.

### **Ehrlich: Geiger**

A. Ehrlich [d.i. Albert Payne]: Berühmte Geiger der Vergangenheit und Gegenwart. Leipzig 1893.

### **Ehrlich: Säng**

A. Ehrlich [d.i. Albert Payne]: Berühmte Sängerinnen der Vergangenheit und Gegenwart. Leipzig 1895.

### **Eichsfeld**

Gestalten des Eichsfeldes. Ein biographisches Lexikon. Bearb. v. Thomas T. Müller und Bernhard Opfermann. 2., erw. und bearb. Aufl. Heiligenstadt 1999.

### **Eisenberg: Bühne**

Ludwig Eisenberg: Großes Biographisches Lexikon der deutschen Bühne im 19. Jahrhundert. Leipzig 1903.

### **ELThG**

Evangelisches Lexikon für Theologie und Gemeinde. Hrsg. v. Helmut Burkhardt und Uwe Swarat in Zusammenarbeit mit Otto Betz, Michael Herbert, Gerhard Ruhbach und Theo Sorg. 3 Bde., Wuppertal/Zürich, 1992-94.

### **Embacher**

Friedrich Embacher: Lexikon der Reisen und Entdeckungen. 1. Abt.: Biographien der Forschungsreisenden von den ältesten Zeiten bis auf die Gegenwart. Leipzig 1882.

### **Enc Exploration**

Raymond John Howgego: Encyclopedia of Exploration to 1800. Potts Point 2003.

### **Enc Jud**

Encyclopaedia Judaica. Das Judentum in Geschichte und Gegenwart. 10 Bde., Berlin 1928-34 [letzter Band bis Lyra, mehr nicht erschienen].

### **Enz Märchen**

Enzyklopädie des Märchens. Handwörterbuch zur historischen und vergleichenden Erzählforschung. Begr. v. Kurt Ranke. Hrsg. v. Rolf Wilhelm Brednich u. a. Berlin/New York 1977 ff.

### **Enz Phil Wiss**

Enzyklopädie Philosophie und Wissenschaftstheorie. In Verbindung mit Gereon Wolters hrsg. v. Jürgen Mittelstraß. 4 Bde., Stuttgart/Weimar, 1995/96. 2., neubearb. und wesentlich erg. Aufl. In Verbindung mit Martin Carrier hrsg. v. Jürgen Mittelstraß. Stuttgart/Weimar 2005 ff.

### **Esselborn**

Karl Esselborn: Hessische Lebensläufe. Hrsg. v. Friedrich Knöpp. Darmstadt 1979.

### **Essner**

Cornelia Essner: Deutsche Afrikareisende im 19. Jahrhundert. Zur Sozialgeschichte des Reisens = Beiträge zur Kolonial- und Überseegegeschichte. Bd. 32. Stuttgart 1985.

### **Exilforschung**

Exilforschung. Ein internationales Jahrbuch. Hrsg. im Auftrag der Gesellschaft für Exilforschung. München 1983 ff.

### **Exiltheater**

Handbuch des deutschsprachigen Exiltheaters 1933-1945. Hrsg. v. Frithjof Trapp, Werner Mittenzwei, Henning Rischbieter und Hansjörg Schneider. 2 Bde., München 1999.

### **Färber**

Bedeutende Oberpfälzer. Hrsg. v. Sigfrid Färber. Regensburg 1981.

### **Felder**

Gelehrten- und Schriftsteller-Lexikon der deutschen Katholischen Geistlichkeit. Hrsg. v. Franz Karl Felder und Franz Joseph Waitzenegger. 3 Bde., Landshut 1817-22.

### **Fellerer**

Rheinische Musiker. Hrsg. v. Karl Gustav Fellerer (6 ff.: Dietrich Kämper). 1.-9. Folge = Beiträge zur rheinischen Musikgeschichte. H. 43 ff. Köln 1972-81.

### **Fellner**

Fritz Fellner/Doris A. Corradini: Österreichische Geschichtswissenschaft im 20. Jahrhundert. Ein biographisch-bibliographisches Lexikon. Wien u. a. 2006.

### **Fey**

Hermann Fey: Schleswig-Holsteinische Musiker von den ältesten Zeiten bis zur Gegenwart. Hamburg 1922.

### **Fisch**

Arnold Fisch: Meine Bundesräte. Stäfa 1989.

### **Flemig**

Kurt Flemig: Karikaturisten-Lexikon. München u. a. 1993.

### **Först**

Aus dreißig Jahren. Rheinisch-Westfälische Politiker-Porträts. Hrsg. v. Walter Först. Köln 1979.

### **Fränk Leb**

Fränkische Lebensbilder. Lebensbilder aus Franken. Neue Folge. Hrsg. v. Gerhard Pfeiffer u. a. Würzburg 1967 ff.

### **Frankf Biogr**

Frankfurter Biographie. Personengeschichtliches Lexikon. Hrsg. v. Wolfgang Klötzer. Bearb. v. Sabine Hock und Reinhard Frost. 2 Bde., Frankfurt/Main 1994-96.

### **Frankf Nationalvers**

Heinrich Best/Wilhelm Weege: Biographisches Handbuch der Abgeordneten der Frankfurter Nationalversammlung 1848/49. Düsseldorf 1996.

## Verzeichnis der abgekürzt zitierten Literatur

### Frankreichfreunde

Frankreichfreunde. Mittler des französisch-deutschen Kulturtransfers (1750-1850). Hrsg. v. Michel Espagne und Werner Greiling. Leipzig 1996.

### Frauen

Frauen. Porträts aus zwei Jahrhunderten. Hrsg. v. Hans Jürgen Schultz. 6. Aufl. Stuttgart 1988.

### Frauen Franken

Inge Meidinger-Geise (Hrsg.): Frauengestalten in Franken. Eine Sammlung von Lebensbildern. Würzburg 1985.

### Frauen Luthertum

Frauenprofile des Luthertums. Lebensgeschichten im 20. Jahrhundert. Hrsg. v. Inge Mager. Gütersloh 2005.

### Fries

Katholische Theologen Deutschlands im 19. Jahrhundert. Hrsg. v. Heinrich Fries und Georg Schwaiger. 3 Bde., München 1975.

### Frölich

Zum Höchsten der Menschheit emporgestrebt. Kurze Lebensbeschreibungen Dresdner Arbeiterfunktionäre und Widerstandskämpfer. Hrsg. v. Elsa Frölich = Beiträge zur Geschichte der Dresdner Arbeiterbewegung. H. 4. Dresden 1959.

### Fuchs

Konrad Fuchs: Siegerländer Unternehmer des 19. Jahrhunderts und ihr Werk. Wiesbaden 1979.

### Gailus

Manfred Gailus: Protestantismus und Nationalsozialismus. Studien zur nationalsozialistischen Durchdringung des protestantischen Sozialmilieus in Berlin. Köln u. a. 2001.

### Gall

Die großen Deutschen unserer Epoche. Hrsg. v. Lothar Gall. Berlin 1985.

### Gatz 1

Die Bischöfe des Heiligen Römischen Reiches 1198 bis 1448. Ein biographisches Lexikon. Hrsg. v. Erwin Gatz unter Mitwirkung v. Clemens Brodkorb. Berlin 2001.

### Gatz 2

Die Bischöfe des Heiligen Römischen Reiches 1448 bis 1648. Ein biographisches Lexikon. Hrsg. v. Erwin Gatz unter Mitwirkung v. Clemens Brodkorb. Berlin 1996.

### Gatz 3

Die Bischöfe des Heiligen Römischen Reiches 1648 bis 1803. Ein biographisches Lexikon. Hrsg. v. Erwin Gatz unter Mitwirkung v. Stephan M. Janker. Berlin 1990.

### Gatz 4

Die Bischöfe der deutschsprachigen Länder 1785/1803 bis 1945. Hrsg. v. Erwin Gatz. Berlin 1983.

### Gatz 5

Die Bischöfe der deutschsprachigen Länder 1945-2001. Ein biographisches Lexikon. Hrsg. v. Erwin Gatz unter Mitwirkung v. Franz Xaver Bischof u. a. Berlin 2002.

### GBBE

Große Bayerische Biographische Enzyklopädie. Hrsg. v. Hans-Michael Körner unter Mitarbeit von Bruno Jahn. 4 Bde., München 2005.

### Geist Gestalt

Geist und Gestalt. Biographische Beiträge zur Geschichte der Bayerischen Akademie der Wissenschaften, vornehmlich im zweiten Jahrhundert ihres Bestehens. Bd. 1: Geisteswissenschaften. Bd. 2: Naturwissenschaften. München 1959.

### Gel Hbg

Gelehrte in Hamburg im 18. und 19. Jahrhundert. Hrsg. v. Hans-Dieter Loose. Hamburg 1976.

### Gerechte

Lexikon der Gerechten unter den Völkern. Deutsche und Österreicher. Hrsg. v. Daniel Fraenkel und Jakob Borut. Göttingen 2005.

### Germanistik

Wissenschaftsgeschichte der Germanistik in Porträts. Hrsg. v. Christoph König, Hans-Harald Müller und Werner Röcke. Berlin/New York 2000.

### Gießen

Gießener Gelehrte in der 1. Hälfte des 20. Jahrhunderts. Hrsg. v. Hans Georg Gundel, Peter Moraw und Volker Press. 2 Teile = Lebensbilder aus Hessen. Bd. 2 = Veröffentlichungen der Historischen Kommission für Hessen. Bd. 35. Marburg 1982.

### Glärner

Große Glärner. 26 Lebensbilder aus fünf Jahrhunderten. Hrsg. v. Fritz Stucki und Hans Thürer. Glarus 1986.

### Glöckel

Bedeutende Schulpädagogen. Werdegang, Werk, Wirkung auf die Schule von heute. Hrsg. v. Hans Glöckel = Beiträge zur Fachdidaktik und Schulpädagogik. Bd. 5. Heilbrunn/Obb 1993.

### Glutz

Vorbilder für Deutsche. Korrektur einer Heldengalerie. Hrsg. Peter Glutz und Wolfgang R. Langenbacher. [Die 2. Aufl. 1986 ist eine unveränderte, von 21 auf 13 Porträts verkürzte Ausgabe] München, Zürich 1974.

### Gnomon

Gnomon. Kritische Zeitschrift für die gesamte klassische Altertumswissenschaft 1 ff. (1925 ff.)

### Göppinger

Horst Göppinger: Juristen jüdischer Abstammung in Deutschland im „Dritten Reich“. Entrechtung und Verfolgung. 2., völlig Neubearb. Aufl. München 1990.

### Gött Gel

Göttinger Gelehrte. Die Akademie der Wissenschaften zu Göttingen in Bildnissen und Würdigungen 1751-2001. Hrsg. v. Karl Arndt, Gerhard Gottschalk und Rudolf Smend. 2 Bde., Göttingen 2001.

### Goez

Werner Goez: Gestalten des Hochmittelalters. Personengeschichtliche Essays im allgemeinhistorischen Kontext. Darmstadt 1983.

### Groehler

Alternativen. Schicksale deutscher Bürger. Hrsg. v. Olaf Groehler. Berlin 1987.

### Große Landw

Günther Franz/Heinz Haushofer (Hrsg.): Große Landwirte. Frankfurt/Main 1970.

### Große Ostpreuß

Große Ost- und Westpreußen. Hrsg. v. Walter Schlusnus. München 1959.

## Verzeichnis der abgekürzt zitierten Literatur

---

### **Große Schles**

Große Schlesier. Hrsg. v. Alfons Hayduk. München 1957.

### **Große Schweizer**

Große Schweizer. Hrsg. v. Martin Hürlimann. Zürich 1942.

### **Großen Dt**

Die großen Deutschen. Neue deutsche Biographie. Hrsg. v. Willy Andreas und Wilhelm von Scholz. 5 Bde., Berlin 1935-37.

### **Grünw Portr**

Grünwalder Porträts. Zusammenestellt von Max Ernst. Grünwald 1989 ff.

### **Grüttner**

Michael Grüttner: Biographisches Lexikon zur national-sozialistischen Wissenschaftspolitik. Heidelberg 2004.

### **Grütznr**

Vera Grütznr: Musiker in Brandenburg vom 16. Jahrhundert bis zur Gegenwart. Berlin 2004.

### **Grummann**

Vitus Grummann: Biographisch-bibliographisches Handbuch der Lichenologie. Nach dem Tode des Verfassers für die Herausgabe durchgesehen v. Oscar Klement. Hildesheim 1974.

### **Gumbinnen**

Dieter Stüttgen: Die preußische Verwaltung des Regierungsbezirks Gumbinnen 1871-1920. Köln/Berlin 1980.

### **Haase**

Österreichische Literatur des 20. Jahrhunderts. Einzeldarstellungen. Hrsg. v. Horst Haase und Antal Mádl. Berlin (DDR) 1988.

### **Habermann 1**

Alexandra Habermann/Rainer Klemmt/Frauke Siefkes: Lexikon deutscher wissenschaftlicher Bibliothekare 1925-1980. Frankfurt/Main 1985. = Zeitschrift für Bibliothekswesen und Bibliographie. Sonderheft 42.

### **Habermann 2**

Alexandra Habermann/Peter Kittel: Lexikon deutscher wissenschaftlicher Bibliothekare. Die wissenschaftlichen Bibliothekare der Bundesrepublik Deutschland (1981-2002) und der Deutschen Demokratischen Republik (1948-1990). Frankfurt/Main 2004.

### **Hachmeister**

Die Herren Journalisten. Elite der deutsche Presse nach 1945. Hrsg. v. Lutz Hachmeister und Friedemann Siering. München 2002.

### **Hagemann**

Harald Hagemann/Claus-Dieter Krohn: Biographisches Handbuch der deutschsprachigen wirtschaftswissenschaftlichen Emigration nach 1933. 2 Bde., München 1999.

### **Hahn**

Barbara Hahn: Frauen in den Kulturwissenschaften. Von Lou Andreas-Salomé bis Hannah Arendt. München 1994.

### **Hahnl**

Hans Heinz Hahnl: Vergessene Literaten. Fünfzig österreichische Lebensschicksale. Wien 1984.

### **Hamann**

Die Habsburger. Ein biographisches Lexikon. Hrsg. v. Brigitte Hamann. München 1988.

### **Hamberger/Meusel**

Das gelehrte Teutschland oder Lexikon der jetzt lebenden teutschen Schriftsteller. Angefangen v. Georg Christoph Hamberger, fortgeführt v. Johann Georg Meusel. 5., durchaus verm. und verb. Aufl. 23 Bde., Lemgo 1796-1834. Nachdr. Hildesheim 1965/66.

### **Hamburg**

Hamburg-Lexikon. Hrsg. v. Franklin Kopitzsch und Daniel Tilgner. 2., durchges. Aufl. Hamburg 2000.

### **Hamburg Biogr**

Hamburgische Biografie. Personenlexikon. Hrsg. v. Franklin Kopitzsch und Dirk Brietzke. Hamburg 2001 ff.

### **Handel**

Namhafte Hochschullehrer der Karl-Marx-Universität Leipzig. Hrsg. v. Gottfried Handel, Fritz Müller und Armin Ermisch. 7 Bde., Leipzig 1982-85.

### **Hannover**

Dirk Böttcher/Klaus Mlynek/Waldemar R. Röhrbein/Hugo Thielen: Hannoversches Biographisches Lexikon. Von den Anfängen bis in die Gegenwart. Hannover 2002.

### **Hassenkamp**

Annemarie Hassenkamp: Frauen stehen ihren Mann. Porträts deutscher Unternehmerinnen. Düsseldorf/Köln 1966.

### **Hauf**

Reinhard Hauf: Die preußische Verwaltung des Regierungsbezirks Königsberg 1870-1920. Köln/Berlin 1980.

### **Haunfelder, Lib Abg**

Bernd Haunfelder: Die liberalen Abgeordneten des Deutschen Reichstags 1871-1918. Ein Biographisches Handbuch. Münster 2004.

### **Haunfelder, Preuß Abg**

Bernd Haunfelder: Biographisches Handbuch für das preußische Abgeordnetenhaus 1849-1867. Düsseldorf 1994.

### **Haunfelder, Zentrumspartei**

Bernd Haunfelder: Reichstagsabgeordnete der Deutschen Zentrumspartei 1871-1933. Biographisches Handbuch und historische Photographien. Düsseldorf 1999.

### **Haunfelder/Pollmann**

Reichstag des Norddeutschen Bundes 1867-1870. Historische Photographien und biographisches Handbuch. Bearb. v. Bernd Haunfelder und Klaus Erich Pollmann. Düsseldorf 1989.

### **Hausjell**

Fritz Hausjell: Journalisten gegen Demokratie oder Faschismus. 2 Tle., Frankfurt/Main u. a. 1989.

### **Heiber, Univ**

Helmut Heiber: Universität unterm Hakenkreuz. 2 Tle., München 1991-94.

### **Heidel/Lienert**

Die Professoren der medizinischen Fakultät Carl Gustav Carus Dresden und ihrer Vorgängereinrichtungen 1814-2004. Hrsg. v. Caris-Petra Heidel und Marina Lienert. München 2005.

### **Heine**

Jens Ulrich Heine: Verstand & Schicksal. Die Männer der I.G. Farbenindustrie A.G. (1925-1945) in 161 Kurzbiographien. Weinheim u. a. 1990.



## Verzeichnis der abgekürzt zitierten Literatur

### Heinrichs

Deutsche Juristen jüdischer Herkunft. Hrsg. v. Helmut Heinrichs, Harald Franzki, Klaus Schmalz und Michael Stolleis. München 1993.

### Heinzlmeier

Adolf Heinzlmeier/Jürgen Menningen/Berndt Schulz: Die großen Stars des deutschen Kinos. Herford 1985.

### Heitzer

Wegbereiter der DDR-Geschichtswissenschaft. Biographien. Hrsg. v. Heinz Heitzer. Berlin 1989.

### Helmstedt

Sabine Ahrens: Die Lehrkräfte der Universität Helmstedt (1576-1810). Helmstedt 2004.

### Henze

Dietmar Henze: Enzyklopädie der Entdecker und Erforscher der Erde. 5 Bde., Graz 1978-2004.

### Herlemann

Beatrix Herlemann: Biographisches Lexikon niedersächsischer Parlamentarier 1919-1945. Hannover 2004.

### Herzberg

Guntolf Herzberg: Aufbruch und Abwicklung. Neue Studien zur Philosophie in der DDR. Berlin 2000.

### Hess Bio

Hessische Biographien. Hrsg. v. Hermann Haupt. 3 Bde., Darmstadt 1918-34.

### Hess Forst

Biographien bedeutender hessischer Forstleute. Wiesbaden 1990.

### Heuer/Wolf

Die Juden der Frankfurter Universität. Hrsg. v. Renate Heuer und Siegbert Wolf. Unter Mitarbeit v. Holger Kiehnel und Barbara Seib. Frankfurt/Main, New York 1997.

### Heyde/Seneta

Christopher C. Heyde/Eugene Seneta u. a. (Hrsg.): Statisticians of the centuries. New York 2001.

### Hickethier

Grenzgänger zwischen Theater und Kino. Schauspielporträts aus dem Berlin der Zwanziger Jahre. Hrsg. v. Knut Hickethier. Berlin 1986.

### Hienz

Hermann A. Hienz: Schriftsteller-Lexikon der Siebenbürger Deutschen. Bio-bibliographisches Handbuch für Wissenschaft, Dichtung und Publizistik. Begründet von Joseph Trausch, fortgeführt von Friedrich Schuller und Herrmann A. Hienz. Bd. 5 ff. Köln u. a. 1995 ff.

### Hildebrand

Hans H. Hildebrand/Ernest Henriot: Deutschlands Admirale 1849-1945. Die militärischen Werdegänge der See-, Ingenieur-, Sanitäts-, Waffen- und Verwaltungsoffiziere im Admiralsrang und Marinebeamten. 4 Bde., Osnabrück 1988.

### Hildesheim Bischöfe

Das Bistum Hildesheim. Bd. 3: Die Hildesheimer Bischöfe von 815 bis 1221 (1227). Bearb. v. Hans Goetting. Berlin/New York 1984.

### Hildesheim Lit

Hildesheimer Literaturlexikon von 1800 bis heute. Hrsg. v. Dirk Kemper. Hildesheim 1996.

### Hillesheim

Jürgen Hillesheim/Elisabeth Michael: Lexikon nationalsozialistischer Dichter. Biographien, Analysen, Bibliographien. Würzburg 1993.

### Historikerlex

Historikerlexikon. Von der Antike bis zur Gegenwart. Hrsg. v. Rüdiger vom Bruch und Rainer A. Müller. 2., überarb. und erw. Aufl. München 2002.

### HLS

Historisches Lexikon der Schweiz. Hrsg. von der Stiftung Historisches Lexikon der Schweiz. Basel 2002 ff.

### Hochmuth/Meyer

Ursel Hochmuth/Gertrud Meyer: Streiflichter aus dem Hamburger Widerstand 1933-1945. Frankfurt/Main 1969.

### Hochreuther

Ina Hochreuther: Frauen im Parlament. Südwestdeutsche Abgeordnete seit 1919. Stuttgart 1992.

### Höpfner

Hans-Paul Höpfner: Die Universität Bonn im Dritten Reich. Akademische Biographien unter nationalsozialistischer Herrschaft. Bonn 1999.

### Höroldt

Dietrich Höroldt: Geschichte der Stadt Bonn. 4 Bde., Bonn 1989 ff.

### Hoffmann-Erbrecht

Schlesisches Musiklexikon. Im Auftrag des Instituts für Deutsche Musik im Osten e.V. Hrsg. v. Lothar Hoffmann-Erbrecht. Augsburg 2001.

### Hofjuden

Rotraud Ries/J. Friedrich Battenberg (Hrsg.): Hofjuden – Ökonomie und Interkulturalität. Die jüdische Wirtschaftselite im 18. Jahrhundert. Hamburg 2002.

### Hohenheim

Die akademischen Lehrer der Universität Hohenheim (Landwirtschaftliche Hochschule) 1818-1968. Bearb. v. Ernst Klein. Stuttgart 1968.

### Holocaust

Enzyklopädie des Holocaust. Hrsg. v. Eberhard Jäckel u. a. 3 Bde., Berlin 1993.

### Honegger/Wobbe

Claudia Honegger/Theresa Wobbe (Hrsg.): Frauen in der Soziologie. Neun Portraits. München 1998.

### HRG

Handwörterbuch zur deutschen Rechtsgeschichte. Hrsg. v. Adalbert Erler und Ekkehard Kaufmann. Bd. 5 zusätzlich v. Dieter Werkmüller. 5 Bde., Berlin 1971-98. 2., völlig überarb. und erw. Aufl. Hrsg. v. Albrecht Cordes, Heiner Lück und Dieter Werkmüller. Berlin 2004 ff.

### Huber

Schauspielerlexikon der Gegenwart. Deutschland, Österreich, Schweiz. Red.: Hermann J. Huber. München, Wien 1986.

### Hupka

Große Deutsche aus Schlesien. Hrsg. v. Herbert Hupka. 2. Aufl. München, Wien 1979.

### IDFF

Tom Pendergast/ Sara Pendergast (Hrsg.): International Dictionary of Films and Filmmakers. 4 Bde., Detroit u. a. 42000.

### IGL

Internationales Germanistenlexikon 1800-1950. Hrsg. und eingel. v. Christoph König. Bearb. v. Birgit Wägenbaur in Zusammenarbeit mit Andrea Frindt, Hanne Knickmann, Volker Michel und Karla Rommel. 3 Bde. und 1 CD-ROM. Berlin/New York 2003.

## Verzeichnis der abgekürzt zitierten Literatur

---

### **Imhoff**

Berühmte Nürnberger aus neun Jahrhunderten. Hrsg. v. Christoph v. Imhoff. Nürnberg 1984.

### **Int Enc Dance**

International Encyclopedia of Dance. Ed. by Selma Jeanne Cohen et al. 6 Bde., New York/Oxford 1998.

### **Int Freimaurerlex**

Eugen Lennhoff/Oskar Posner/Dieter A. Binder: Internationales Freimaurerlexikon. Zürich u. a. 1932. Überarb. Neuauf. München 2000.

### **ISZ**

Internationales Soziologenlexikon. Hrsg. v. Wilhelm Bernsdorf und Horst Knospe. 2., neubearb. Aufl. 2 Bde., Stuttgart 1980-84.

### **Jacoby**

Lexikon linker Leitfiguren. Hrsg. v. Edmund Jacoby. Frankfurt/Main, Olten, Wien 1988.

### **Jagemann**

Winfried Jagemann: Die Präsidenten des Obersten Bayerischen Gerichtshofes. In: Das Bayerische Oberste Landesgericht. Hrsg. v. Gerhard Herbst. München 1993, S. 167-209.

### **Jb AWG**

Jahrbuch der Akademie der Wissenschaften in Göttingen. Göttingen 1941 ff.

### **Jb BAW**

Jahrbuch der Bayerischen Akademie der Wissenschaften. München 1913 ff.

### **Jb BBAW**

Berlin-Brandenburgische Akademie der Wissenschaften. Jahrbuch 1992/93 (1994) ff.

### **Jb HAW**

Jahrbuch der Heidelberger Akademie der Wissenschaften. Heidelberg 1963 ff.

### **Jb MPG**

Jahrbuch der Max-Planck-Gesellschaft zur Förderung der Wissenschaften. 1951 ff.

### **Jb NRWAW**

Jahrbuch der Nordrhein-Westfälischen Akademie der Wissenschaften 1993 (1994) ff.

### **Jb SAW**

Jahrbuch der Sächsischen Akademie der Wissenschaften zu Leipzig. Stuttgart u. a. 1954 ff.

### **Jugler**

Johann Friedrich Jugler: Beyträge zur juristischen Biographie. Genauere literarische und critische Nachrichten von dem Leben und den Schriften verstorbener Rechtsgelehrten und Staatsmänner, welche sich in Europa berühmt gemacht haben. 6 Bde., Leipzig 1773-80.

### **Jung**

Österreichische Porträts. Leben und Werk bedeutender Persönlichkeiten von Maria Theresia bis Ingeborg Bachmann. Hrsg. v. Jochen Jung. 2 Bde., Salzburg 1985.

### **Juristen**

Juristen im Portrait. Verlag und Autoren in 4 Jahrzehnten. Festschrift zum 225jährigen Jubiläum des Verlages C. H. Beck. München 1988.

### **Juristinnen**

Deutscher Juristinnenbund e. V. (Hrsg.): Juristinnen in Deutschland. Die Zeit von 1900 bis 2003. 4., neu bearbeitete Auflage. Baden-Baden 2003.

### **Kammergericht**

Erik Amburger. Das Kammergericht und seine Präsidenten. Berlin 1955.

### **Kanzler**

Die Deutschen Kanzler. Von Bismarck bis Schmidt. Hrsg. v. Wilhelm von Sternburg. Königstein/Taunus 1985.

### **Kath Theol**

Katholische Theologen der Reformationszeit. Bd. 1-5 hrsg. v. Erwin Iserloh. Bd. 6 hrsg. v. Heribert Smolinsky und Peter Walter. Münster 1984-2004.

### **Keil**

Ostdeutsches Lesebuch. 1: Vier Jahrhunderte deutscher Dichtung vom Baltikum bis zum Banat; 2: Deutsche Dichtung der Jahrhundertmitte vom Baltikum bis zum Banat. Hrsg. v. Ernst-Edmund Keil. Bonn 1983/84.

### **Keintzel**

Wissenschaftlerinnen in und aus Österreich. Leben – Werk – Wirken. Hrsg. v. Brigitta Keintzel und Ilse Korotin. Wien u. a. 2002.

### **Kempf/Merz**

Udo Kempf/Hans-Georg Merz (Hrsg.): Kanzler und Minister 1949-1998. Biografisches Lexikon der deutschen Bundesregierungen. Wiesbaden 2001.

### **Kertz**

Walter Kertz: Biographisches Lexikon zur Geschichte der Geophysik. Hrsg. v. Karl-Heinz Glaßmeier und Ruth Kertz. Braunschweig 2002.

### **Kieling**

Uwe Kieling: Berliner Baubeamte und Staatsarchitekten im 19. Jahrhundert. Biographisches Lexikon. Berlin 1986.

### **Killy**

Literatur-Lexikon. Autoren und Werke deutscher Sprache. Hrsg. v. Walther Killy. Bd. 1-12. Gütersloh/München 1988-92.

### **Kim**

Zivilrechtslehrer deutscher Sprache. Lehrer, Schüler, Werke. Hrsg. v. Hyung-Bae Kim und Wolfgang Frh. Marschall von Bieberstein. Seoul/München 1988.

### **Klein**

Thomas Klein: Leitende Beamte der allgemeinen Verwaltung in der preußischen Provinz Hessen-Nassau und in Waldeck 1867-1945. Darmstadt u. a. 1988

### **Kleinheyer**

Gerd Kleinheyer/Jan Schröder: Deutsche und Europäische Juristen aus neun Jahrhunderten. Eine biographische Einführung in die Geschichte der Rechtswissenschaft. 4., neubearb. und erw. Aufl. Heidelberg 1996.

### **KLG**

Kritisches Lexikon zur deutschsprachigen Gegenwartsliteratur. Hrsg. v. Heinz Ludwig Arnold. Loseblatt-Ausgabe. München 1978 ff.

### **Knorr**

Frauen im deutschen Südwesten. Hrsg. v. Birgit Knorr und Rosemarie Wehling. Stuttgart 1993.

### **Koch: Jesuiten**

Ludwig Koch: Jesuiten-Lexikon. Paderborn 1934.

## Verzeichnis der abgekürzt zitierten Literatur

### **Kölner Autoren-Lex**

Kölner Autoren-Lexikon 1750-2000. 2 Bde., Köln 2000-2002 (Bd. 1: 1750-1900. Nach Vorarbeiten von Gertrud Wegener unter Mitwirkung von Heribert A. Hilgers bearb. v. Enno Stahl. Bd. 2: 1901-2000: Auf der Grundlage des LiK-Archivs der Stadtbibliothek Köln, geleitet von Uta Biedermann, und unter Mitwirkung von Heribert A. Hilgers bearb v. Enno Stahl).

### **Königsberger Prof**

Die Albertus-Universität zu Königsberg und ihre Professoren. Aus Anlaß der Gründung der Albertus-Universität vor 450 Jahren. Hrsg. v. Dietrich Rauschnig und Donata v. Nerée. Berlin 1995 (Jahrbuch der Albertus-Universität zu Königsberg, Pr.; Bd. 29 = 1994).

### **Koenig-W.**

Gabriele von Koenig-Warhausen: Lebensläufe. Biographien bedeutender Persönlichkeiten. Biberach 1988.

### **Kolle**

Große Nervenärzte. 21 Lebensbilder. Hrsg. v. Kurt Kolle. Stuttgart 1956.

### **Kons Pol**

Konservative Politiker in Deutschland. Eine Auswahl biographischer Porträts aus zwei Jahrhunderten. Hrsg. v. Hans-Christof Kraus. Berlin 1995.

### **Kosch: Kath**

Wilhelm Kosch: Das katholische Deutschland. Biographisch-bibliographisches Lexikon. 3 Bde., Augsburg 1933-38.

### **Kosch: Theater**

Wilhelm Kosch: Deutsches Theater-Lexikon. Biographisches und bibliographisches Handbuch. Ab Bd. 3 fortgef. v. Ingrid Bigler-Marschall. Klagenfurt/Wien [ab Bd. 3: Bern] 1953 ff.

### **Koszyk**

Kurt Koszyk: Publizistik und politisches Engagement. Lebensbilder publizistischer Persönlichkeiten. Hrsg. und eingeleitet v. Walter Hömberg, Arnulf Kutsch und Horst Pöttker. Münster 1999.

### **Krackowizer**

Ferdinand Krackowizer/Franz Berger: Biographisches Lexikon des Landes Österreich ob der Enns. Passau/Linz 1931.

### **Krafft**

Große Naturwissenschaftler. Biographisches Lexikon. Mit einer Bibliographie zur Geschichte der Naturwissenschaften. Hrsg. v. Fritz Krafft. 2., neubearb. und erw. Aufl. Düsseldorf 1986.

### **Kreuter**

Alma Kreuter: Deutschsprachige Neurologen und Psychiater. Ein biographisch-bibliographisches Lexikon von den Vorläufern bis zur Mitte des 20. Jahrhunderts. 3 Bde., München u.a. 1996.

### **Krieg**

Thilo Krieg: Das geehrte und gelehrte Coburg. Ein lebensgeschichtliches Nachschlagebuch. 3 Bde., Coburg 1927-31.

### **Kuhn**

Adam Kuhn: Bedeutende Biberacher. Biberach-Riß 1929.

### **Kulturwissenschaftler**

Kulturwissenschaftler des 20. Jahrhunderts. Ihr Werk im Blick auf das Europa der Frühen Neuzeit. Unter Mitwirkung von Sabine Kleymann hrsg. v. Klaus Garber. München 2002.

### **Kutsch**

Karl J. Kutsch/Leo Riemens †: Großes Sängerlexikon. 4., erweiterte und aktualisierte Aufl. 7 Bde., München 2003.

### **Landwirte**

Hans-Heinrich Müller/Volker Klemm: Im Dienste der Ceres. Streiflichter zu Leben und Werk bedeutender deutscher Landwirte und Wissenschaftler. Leipzig, Jena, Berlin 1988.

### **Lanner**

Tiroler Ehrenkranz. Männergestalten aus Tirols letzter Vergangenheit. Hrsg. v. Alois Lanner. Innsbruck, Wien, München 1926.

### **Laubner**

Jürgen Laubner (Hrsg.): Adel und Junkertum im 19. und 20. Jahrhundert. Biographische Studien zu ihrer politischen, ökonomischen und sozialen Entwicklung. Halle/Saale 1990.

### **Layer**

Adolf Layer: Schwäbisches Ehrenbuch. Gestalten des 20. Jahrhunderts in und aus Bayerisch Schwaben. Weißenhorn 1985.

### **Leb Aargau**

Lebensbilder aus dem Aargau 1803-1953 = 150 Jahre Kanton Aargau. Bd. 1. Aarau 1953.

### **Leb Altenkirchen**

Lebensbilder aus dem Kreis Altenkirchen. Hrsg. vom Heimatverein für den Kreis Altenkirchen in Verbindung mit dem Kreisarchiv Altenkirchen/Westerwald. Altenkirchen 1979.

### **Leb Baden-Württ**

Lebensbilder aus Baden-Württemberg. Hrsg. v. Gerhard Taddey und Joachim Fischer. Stuttgart 1994 ff. (Fortsetzung der als Schwäbische Lebensbilder eröffneten Reihe, Bd. 18 ff.).

### **Leb Bayer Schwaben**

Lebensbilder aus dem Bayerischen Schwaben. Hrsg. v. Götz Frh. von Pölnitz u. a. München/Weißenhorn 1952 ff.

### **Leb bekenn Kirche**

Lebensbilder aus der bekennenden Kirche. Hrsg. v. Wilhelm Niemöller. Bielefeld 1949.

### **Leb Berlin 1**

Berlinische Lebensbilder. Bd. 1: Naturwissenschaftler. Hrsg. v. Wilhelm Treue und Gerhard Hildebrandt. Berlin 1987.

### **Leb Berlin 2**

Berlinische Lebensbilder. Bd. 2: Mediziner. Hrsg. v. Wilhelm Treue und Rolf Winau. Berlin 1987.

### **Leb Berlin 3**

Berlinische Lebensbilder. Bd. 3: Wissenschaftspolitik in Berlin. Minister, Beamte, Ratgeber. Hrsg. v. Wolfgang Treue und Karlfried Gründer. Berlin 1987.

### **Leb Berlin 4**

Berlinische Lebensbilder. Bd. 4: Geisteswissenschaftler. Hrsg. v. Michael Erbe. Berlin 1989.

### **Leb Berlin 5**

Berlinische Lebensbilder. Bd. 5: Theologen. Hrsg. v. Gerd Heinrich. Berlin 1990.

### **Leb Berlin 6**

Berlinische Lebensbilder. Bd. 6: Techniker. Hrsg. v. Wilhelm Treue und Wolfgang König. Berlin 1990.

## Verzeichnis der abgekürzt zitierten Literatur

---

### **Leb Berlin 7**

Berlinische Lebensbilder. Bd. 7: Stadtoberhäupter. Hrsg. v. Wolfgang Ribbe. Berlin 1992.

### **Leb Berlin 9**

Berlinische Lebensbilder. Bd. 9: Stadtbild und Frauenleben. Berlin im Spiegel von 16 Frauenporträts. Hrsg. v. Henrike Hülsbergen. Berlin 1997.

### **Leb böhm Länder**

Lebensbilder zur Geschichte der böhmischen Länder. Hrsg. im Auftrag des Collegium Carolinum v. Karl Bosl, ab Bd. 3 v. Ferdinand Seibt. München 1974 ff.

### **Leb Franken**

Lebensläufe aus Franken. Hrsg. v. Anton Chroust. Bd. 1-6. Würzburg 1919-60.

### **Leb Freising 1**

Christenleben im Wandel der Zeit. Bd. 1: Lebensbilder aus der Geschichte des Bistums Freising. Hrsg. v. Georg Schwaiger. München 1987.

### **Leb Freising 2**

Christenleben im Wandel der Zeit. Bd. 2: Lebensbilder aus der Geschichte des Erzbistums München und Freising. Hrsg. v. Georg Schwaiger. München 1987.

### **Leb Harz**

Lebensbilder aus Harz und Börde. Eine Sammlung von Biographien. Bearb. v. Wolf-Dieter Ostermann. 2 Bde., Halberstadt 1999.

### **Leb Industrie 1**

Lebensbilder aus dem rheinisch-westfälischen Industriegebiet. Hrsg. v. Fritz Pudor. Jg. 1952-54. Düsseldorf 1957.

### **Leb Industrie 2**

Lebensbilder aus dem rheinisch-westfälischen Industriegebiet. Bearb. v. Fritz Pudor. Jg. 1955-57. Düsseldorf 1960.

### **Leb Industrie 3**

Lebensbilder aus dem rheinisch-westfälischen Industriegebiet 1958-59. Bearb. v. Fritz Pudor. Jg. 1958-59. Düsseldorf 1962.

### **Leb Industrie 4**

Lebensbilder aus dem rheinisch-westfälischen Industriegebiet 1960-61. Bearb. v. Fritz Pudor. Jg. 1960-61. Köln, Opladen 1966.

### **Leb Industrie 5**

Lebensbilder aus dem rheinisch-westfälischen Industriegebiet. Bearb. v. Fritz Pudor. Jg. 1962-67. Baden-Baden 1977.

### **Leb Industrie 6**

Lebensbilder aus dem rheinisch-westfälischen Industriegebiet 1968-72. Bearb. v. Barbara Gerstein. Jg. 1968-72. Baden-Baden 1980.

### **Leb Industrie 7**

Lebensbilder aus dem rheinisch-westfälischen Industriegebiet 1973-76. Bearb. v. Gertrud Milkereit. Jg. 1973-76. Baden-Baden 1984.

### **Leb Ingenieurwiss**

Lebensbilder von Ingenieurwissenschaftlern. Eine Sammlung von Biographien aus zwei Jahrhunderten. Hrsg. v. Gisela Buchheim und Rolf Sonnemann. Leipzig 1989.

### **Leb Kurhessen**

Lebensbilder aus Kurhessen und Waldeck 1830-1930. Hrsg. v. Ingeborg Schnack. Bd. 1-6 = Veröffentlichungen der Historischen Kommission für Kurhessen und Waldeck. Reihe 20, Bd. 1-6. Marburg 1939-58.

### **Leb Liegnitz**

Liegnitzer Lebensbilder des Stadt- und Landkreises. Hrsg. v. Hubert Unverricht. 4 Bde., Hofheim/Taunus 2001-05.

### **Leb Mitteldt**

Mitteldeutsche Lebensbilder. Bd. 1-5. Magdeburg 1926-30. N.F. Köln u. a. 2002 ff.

### **Leb Nassau**

Nassauische Lebensbilder. Hrsg. v. Rudolf Vaupel. Bd. 1-6. Wiesbaden 1940-61.

### **Leb Nationalökonom**

Lebensbilder großer Nationalökonom. Einführung in die Geschichte der Politischen Ökonomie. Hrsg. v. Horst Claus Recktenwald. Köln, Berlin 1965.

### **Leb Neuss**

Lebensbilder aus dem Kreis Neuss. Hrsg.: Kreisheimatbund Neuss e.V. Dormagen 1993 ff.

### **Leb Nieders**

Niedersächsische Lebensbilder. Hrsg. v. Otto Heinrich May. Bd. 1-9. Hildesheim 1939-76.

### **Leb Pfalz**

Pfälzer Lebensbilder. Hrsg. v. Kurt Baumann. Bd. 1-5. Speyer 1964-96.

### **Leb Pommern**

Pommersche Lebensbilder. Hrsg. v. Adolf Hofmeister u. a. Bd. 1-3. Stettin 1934-39. Bd. 4 ff., Köln/Wien 1966 ff.

### **Leb Regensburg**

Lebensbilder aus der Geschichte des Bistums Regensburg. Hrsg. v. Georg Schwaiger. Teil 1.2 = Beiträge zur Geschichte des Bistums Regensburg. Bd. 23/24. Regensburg 1989.

### **Leb Rhein**

Rheinische Lebensbilder. Hrsg. v. Edmund Strutz. Bd. 1-18. Düsseldorf 1961-2000.

### **Leb Ries**

Lebensbilder aus dem Ries vom 13. Jahrhundert bis zur Gegenwart. Hrsg. v. Wulf-Dietrich Kavasch, Günter Lemke und Albert Schlagbauer. Nördlingen 2002.

### **Leb Saarland**

Saarländische Lebensbilder. Hrsg. v. Peter Neumann. 4 Bde., Saarbrücken 1982-89.

### **Leb Saarpfalz**

Saarpfälzische Lebensbilder. Hrsg. v. Kurt von Raumer und Kurt Baumann. Bd. 1. Kaiserslautern 1938.

### **Leb Sachsen**

Sächsische Lebensbilder. Bd. 1-3. Hrsg. von der Sächsischen Akademie der Wissenschaften zu Leipzig. Dresden 1930-41. Bd. 4. Hrsg. v. Reiner Groß und Gerald Wiemers. Leipzig 1999. Bd. 5. Hrsg. v. Gerald Wiemers. Leipzig 2003.

### **Leb Schlesien**

Schlesische Lebensbilder. Hrsg. v. Friedrich Andreae, namens der Historischen Kommission für Schlesien. Bd. 1-4. Breslau 1922-31. Bd. 5. Würzburg 1968 (Bd. 1-5, 2. Aufl., Sigmaringen 1985.) Bd. 6: Schlesier des 15. bis 20. Jahrhunderts. Hrsg. v. Josef Joachim Menzel und Ludwig Petry. Sigmaringen 1990. Bd. 7: Schlesier des 15. bis 20. Jahrhunderts. Hrsg. v. Josef Joachim Menzel. Sigmaringen 2001. Bd. 8: Schlesier des 14. bis 20. Jahrhunderts. Hrsg. v. Arno Herzig. Neustadt/Aisch 2004.

## Verzeichnis der abgekürzt zitierten Literatur

- Leb Schwaben**  
Schwäbische Lebensbilder. Bd. 7 ff. u. d. T.: Lebensbilder aus Schwaben und Franken. Hrsg. v. Hermann Haering. Bd. 1-17. Stuttgart 1940-91.
- Leb Siegerland**  
Siegerländer Lebensbilder. Hrsg. v. Wilhelm Güthling. Siegen 1954.
- Leb Stettin**  
Eckhard Wendt: Stettiner Lebensbilder. Köln 2004.
- Leb Sudeten**  
Sudetendeutsche Lebensbilder. Hrsg. v. Erich Gierach. Bd. 1-3. Reichenberg 1926-34.
- Leb Sudeten Lehrer**  
Lebens- und Arbeitsbilder sudetendeutscher Lehrer. 2 Bde., Brünn 1932/33.
- Leb Tübingen**  
Lebensbilder aus der Geschichte der Tübinger Juristenfakultät. Hrsg. v. Ferdinand Elsener. Tübingen 1977.
- Leb Westfalen**  
Westfälische Lebensbilder. Hrsg. v. Aloys Böhmer, Otto Leunenschloß u. a. Bd. 1-17. Münster 1930-2005.
- Leb Würzburg**  
Lebensbilder bedeutender Würzburger Professoren. Hrsg. v. Peter Baumgart. Neustadt a. d. Aisch 1995.
- Lebenswege Thür**  
Lebenswege in Thüringen. Hrsg. v. Felicitas Marwinski. Weimar 2000 ff.
- Leesch**  
Leesch, Wolfgang: Die deutschen Archivare 1500-1945. Bd. 2: Biographisches Lexikon. München u. a. 1992.
- Leinsle 1**  
Ulrich Gottfried Leinsle: Das Ding und die Methode. Methodische Konstitution und Gegenstand der frühen protestantischen Metaphysik. Augsburg 1985.
- Leinsle 2**  
Ulrich Gottfried Leinsle: Reformversuche protestantischer Metaphysik im Zeitalter des Rationalismus. Augsburg 1988.
- Lenard**  
Paul Lenard: Große Naturforscher. Eine Geschichte der Naturforschung in Lebensbeschreibungen. 4., verm. und neu bearb. Aufl. München 1941.
- Lerchenmüller**  
Joachim Lerchenmüller: „Keltischer Sprengstoff“. Eine wissenschaftsgeschichtliche Studie über die deutsche Keltologie von 1900-1945. Tübingen 1997.
- Leser**  
Werk und Widerhall. Große Gestalten des österreichischen Sozialismus. Hrsg. v. Norbert Leser. Wien 1964.
- Leweke**  
Wendelin Leweke: Berühmte Frankfurter. 57 Begegnungen mit der Geschichte. Frankfurt/Main 1988.
- Lex bed Naturwiss**  
Lexikon der bedeutenden Naturwissenschaftler in drei Bänden. Hrsg. v. Dieter Hoffmann, Hubert Laitko und Steffan Müller-Wille unter Mitarbeit v. Ilse Jahn. Heidelberg/Berlin 2003.
- Lex Christl Demokr**  
Lexikon der Christlichen Demokratie in Deutschland. Hrsg. v. Winfried Becker, Günter Buchstab, Anselm Doering-Manteuffel und Rudolf Morsey. Paderborn u. a. 2002.
- Lex dt-jüd Autoren**  
Lexikon deutsch-jüdischer Autoren. Redaktionelle Leitung: Renate Heuer. München u. a. 1992 ff.
- Lex dt-spr Gegenwartslit**  
Lexikon der deutschsprachigen Gegenwartsliteratur seit 1945. Begr. v. Hermann Kunisch, fortgeführt von Herbert Wiesner, Sibylle Cramer und Dietz-Rüdiger Moser, neu hrsg. v. Thomas Kraft. 2 Bde., München 2003.
- Lex Elektrotechniker**  
Lexikon der Elektrotechniker. Hrsg. v. Kurt Jäger. Berlin/Offenbach 1996.
- Lex Gramm**  
Lexicon Grammaticorum. Who's Who in the History of World Linguistics. Hrsg. v. Harra Stammerjohann u. a. Tübingen 1996.
- Lex jüd Phil**  
Andreas B. Kilcher/Otfried Fraise (Hrsg.): Metzler-Lexikon jüdischer Philosophen. Philosophisches Denken des Judentums von der Antike bis zur Gegenwart. Unter Mitarbeit v. Yossef Schwartz. Stuttgart/Weimar 2003.
- Lex Kunst**  
Lexikon der Kunst. Architektur, bildende Kunst, angewandte Kunst, Industrieformgestaltung, Kunsttheorie. Begr. v. Gerhard Strauss. Hrsg. v. Harald Olbrich. Neubearbeitung. 7 Bde., Leipzig 1987-94.
- LexMA**  
Lexikon des Mittelalters. 10 Bde., München/Zürich 1980-99.
- Lex österr Exillit**  
Siglinda Bolbecher/Konstantin Kaiser: Lexikon der österreichischen Exilliteratur. Wien 2000.
- Lex sozialist Lit**  
Lexikon sozialistischer Literatur. Ihre Geschichte in Deutschland bis 1945. Hrsg. v. Simone Barck, Silvia Schlenstedt, Tanja Bürgel, Volker Giel und Dieter Schiller. Stuttgart/Weimar 1994.
- LGB**  
Lexikon des gesamten Buchwesens. 2., völlig neu bearb. Aufl. Hrsg. v. Severin Corsten, u. a. Stuttgart 1987 ff.
- Liegnitz**  
Werner Elsner: Liegnitzer Stadtgeschichte. 3 Bde., Lorch 1971-78.
- Lill**  
20. Juli. Porträts des Widerstands. Hrsg. v. Rudolf Lill und Heinrich Oberreuter. Aktualisierte und überarb. Neuaufl. Düsseldorf, Wien 1994.
- Lilla, Preuß Staatsrat**  
Der Preußische Staatsrat 1921-1933. Ein biographisches Handbuch. Mit einer Dokumentation der im „Dritten Reich“ berufenen Staatsräte. Bearb. v. Joachim Lilla. Düsseldorf 2005.
- Lilla, Reichsrat**  
Der Reichsrat. Vertretung der deutschen Länder bei der Gesetzgebung und Verwaltung des Reichs 1919-1934. Ein biographisches Handbuch. Unter Einbeziehung des Bundesrates Nov. 1918 – Febr. 1919 und des Staatenausschusses Febr. – Aug. 1919. Bearb. v. Joachim Lilla. Düsseldorf 2006.

## Verzeichnis der abgekürzt zitierten Literatur

---

### **Lilla, Statisten**

Statisten in Uniform. Die Mitglieder des Reichstags 1933-1945. Ein biographisches Handbuch. Unter Einbeziehung der völkischen und nationalsozialistischen Reichstagsabgeordneten ab Mai 1924. Bearb. v. Joachim Lilla. Unter Mitarbeit v. Martin Döring und Andreas Schulz. Düsseldorf 2004.

### **Lloyd**

Norman Lloyd: Großes Lexikon der Musik. 3 Bde., Augsburg 1988.

### **LMU**

Biographisches Lexikon der Ludwig-Maximilians-Universität München. Hrsg. v. Laetitia Boehm, Winfried Müller, Wolfgang J. Smolka und Helmut Zedemaier. Teil I: Ingolstadt-Landshut 1472-1826. Berlin 1998.

### **Lösche**

Vor dem Vergessen bewahren. Lebenswege Weimarer Sozialdemokraten. Hrsg. v. Peter Lösche, Michael Scholing und Franz Walter. Berlin 1988.

### **Lowenthal**

Bewährung im Untergang. Ein Gedenkbuch. Hrsg. v. Ernst Gottfried Lowenthal. Stuttgart 1965.

### **LSDL**

Lexikon sozialistischer deutscher Literatur. Von den Anfängen bis 1945. Monographisch-biographische Darstellungen. s'Gravenhage 1973.

### **LThK**

Lexikon für Theologie und Kirche. Begr. v. Michael Buchberger. Hrsg. v. Josef Höfer und Karl Rahner. 10 Bde., Freiburg/Breisgau 1930-38. 2., völlig neu bearb. Aufl. Hrsg. v. Josef Höfer und Karl Rahner. 10 Bde., Freiburg/Breisgau 1957-65. 3., völlig neu bearb. Aufl. Hrsg. v. Walter Kasper mit Konrad Baumgartner, Horst Bürkle, Klaus Ganzer, Karl Kerstige, Wilhelm Korff und Peter Walter. 11 Bde., Freiburg/Breisgau u. a. 1993-2001.

### **Lübker/Schröder**

D(elev) L(orenz) Lübker/H(ans) Schröder: Lexikon der Schleswig-Holstein-Lauenburgischen und Eutinischen Schriftsteller von 1796 bis 1828. 2 Bde., Altona 1829-30.

### **Lüdicke**

Reinhard Lüdicke: Die Preußischen Kultusminister und ihre Beamten im ersten Jahrhundert des Ministeriums 1817-1917. Stuttgart/Berlin 1918.

### **Lüttgendorff**

Willibald Leo von Lüttgendorff: Die Geigen- und Lautenmacher vom Mittelalter bis zur Gegenwart. Frankfurt/Main 1904.

### **LuK**

Literatur und Kritik 1 ff. (1966 ff.)

### **Lullies**

Archäologenbildnisse. Porträts und Kurzbiographien von Klassischen Archäologen deutscher Sprache. Hrsg. v. Reinhard Lullies und Wolfgang Schiering. Mainz 1988.

### **Männer Nahrung**

Männer die Nahrung schufen. Hrsg. v. Otto Keune. Hannover 1952.

### **Männer Wirtschaft**

Heinz Renk/Ernst Ruhe: Männer der Wirtschaft. Unternehmen der Gründerzeit. Gütersloh 1966.

### **Mann, Preuß Abg**

Biographisches Handbuch für das preußische Abgeordnetenhaus 1867-1918. Bearb. v. Bernhard Mann unter Mitarbeit v. Martin Doerry, Cornelia Rauh und Thomas Kühne. Düsseldorf 1988.

### **Marburg**

Marburger Gelehrte in der ersten Hälfte des 20. Jahrhunderts. Hrsg. v. Ingeborg Schnack = Lebensbilder aus Hessen. Bd. 1. Marburg 1977.

### **Marcon/Strecker**

200 Jahre Wirtschafts- und Staatswissenschaften an der Eberhard-Karls-Universität Tübingen. Leben und Werk der Professoren. Die Wirtschaftswissenschaftliche Fakultät der Universität Tübingen und ihre Vorgänger (1817-2002). Hrsg. v. Helmut Marcon und Heinrich Strecker. 2 Bde., Stuttgart 2004.

### **Matschoß: Ing**

Conrad Matschoß: Große Ingenieure. Lebensbeschreibungen aus der Geschichte der Technik. München 1937.

### **Matschoß: Tech**

Conrad Matschoß: Männer der Technik. Ein biographisches Handbuch. Berlin 1925.

### **MBL**

Guido Heinrich/Gunter Schandera: Magdeburger biographisches Lexikon. 19. und 20. Jahrhundert. Biographisches Lexikon für die Landeshauptstadt Magdeburg und die Landkreise Bördekreis, Jerichower Land, Ohrekreis und Schönebeck. Magdeburg 2002.

### **MdB**

Biographisches Handbuch der Mitglieder des Deutschen Bundestages 1949-2002. Hrsg. v. Rudolf Vierhaus und Ludolf Herbst unter Mitarbeit v. Bruno Jahn. 3 Bde., München 2002/03.

### **MdR**

Die Reichstagsabgeordneten der Weimarer Republik in der Zeit des Nationalsozialismus. Politische Verfolgung, Emigration und Ausbürgerung 1933-1945. Eine biographische Dokumentation. Hrsg. v. Martin Schumacher. 3., erheblich erw. und überarb. Aufl. Düsseldorf 1994.

### **Mecklenburg**

Biographisches Lexikon für Mecklenburg. Hrsg. v. Sabine Pettke. Rostock 1995 ff.

### **Med Pommern**

Hans Reddemann: Berühmte und bemerkenswerte Mediziner in und aus Pommern. Schwerin 2003.

### **Mellenthin**

Friedrich Wilhelm von Mellenthin: Deutschlands Generale des Zweiten Weltkriegs. Bergisch Gladbach 1977.

### **Menz**

Deutsche Buchhändler. Hrsg. v. Gerhard Menz. Leipzig/Stuttgart 1925.

### **Merkel/Wunder**

Deutsche Frauen der Frühen Neuzeit. Dichterinnen, Mäzeninnen, Mäzeninnen. Hrsg. v. Kerstin Merkel und Heide Wunder. Darmstadt 2000.

### **Merlo**

Johann Jacob Merlo: Kölnische Künstler in alter und neuer Zeit. Köln 1895.

### **Metzler Autoren**

Metzler-Autoren-Lexikon. Deutschsprachige Dichter und Schriftsteller vom Mittelalter bis zur Gegenwart. Hrsg. v. Bernd Lutz. Stuttgart 1986.

## Verzeichnis der abgekürzt zitierten Literatur

### **Metzler Kabarett**

Klaus Budzinski/Reinhard Hippen: Metzler-Kabarett-Lexikon. Stuttgart/Weimar 1996.

### **Metzler Komponisten**

Metzler-Komponisten-Lexikon. Hrsg. v. Horst Weber. Stuttgart 1992.

### **Metzler Kunsthistoriker**

Peter Bethhausen/Peter H. Feist/Christiane Fork: Metzler Kunsthistoriker Lexikon. 210 Porträts deutschsprachiger Autoren aus vier Jahrhunderten. Unter Mitarbeit v. Karin Rührdanz und Jürgen Zimmer. 2., aktualisierte und erweiterte Auflage. Stuttgart/Weimar 2007.

### **Metzler Philosophen**

Metzler-Philosophen-Lexikon. 300 biographisch-werkgeschichtliche Porträts von den Vorsokratikern bis zu den Neuen Philosophen. Hrsg. v. Bernd Lutz. Stuttgart/Weimar 2003.

### **Meyer**

Lexikon des Sozialismus. Hrsg. v. Thomas Meyer u. a. Köln 1986.

### **MGG**

Die Musik in Geschichte und Gegenwart. Allgemeine Enzyklopädie der Musik. Hrsg. v. Friedrich Blume. 17 Bde., Kassel/Basel 1949-86. 2., neubearb. Ausgabe. Hrsg. v. Ludwig Finscher. Personenteil. 17 Bde., Kassel u. a. 1999-2007.

### **Michalski**

Bettina Michalski: Louise Schroeders Schwestern. Berliner Sozialdemokratinnen der Nachkriegszeit. Bonn 1996.

### **Mielke**

Siegfried Mielke (Hrsg.): Gewerkschafter in den Konzentrationslagern Oranienburg und Sachsenhausen. Biographisches Handbuch. Berlin 2002.

### **Mikroskopie**

Geschichte der Mikroskopie. Leben und Werk großer Forscher. Hrsg. v. Hugo Freund und Alexander Berg. Bd. 3: Angewandte Naturwissenschaften und Technik. Frankfurt/Main 1966.

### **Modern Dance**

International Dictionary of Modern Dance. Hrsg. v. Taryn Benbow-Pfalzgraf. Detroit/New York/London 1998.

### **Mühlleitner**

Elke Mühlleitner: Biographisches Lexikon der Psychoanalyse. Die Mitglieder der Psychologischen Mittwoch-Gesellschaft und der Wiener Psychoanalytischen Vereinigung 1902-1938. Tübingen 1992.

### **Müller-Dietz**

Heinz E. Müller-Dietz: Ärzte zwischen Deutschland und Rußland. Lebensbilder zur Geschichte der medizinischen Wechselbeziehungen. Stuttgart/Jena/New York 1995.

### **Müller-Hill**

Benno Müller Hill: Tödliche Wissenschaft. Die Aussonderung von Juden, Zigeunern und Geisteskranken 1933-1945. Reinbek bei Hamburg 1984.

### **Münster**

Geschichte der Stadt Münster. Hrsg. v. Franz-Josef Jakobi. 3 Bde., Münster 1994.

### **Munzinger**

Munzinger. Internationales Biographisches Archiv. Ravensburg 1949 ff.

### **Myß**

Die Siebenbürger Sachsen. Lexikon. Geschichte, Kultur, Zivilisation, Wissenschaften, Wirtschaft, Lebensraum Siebenbürgen (Transsilvanien). Hrsg. v. Walter Myß. Thaur bei Innsbruck 1993.

### **Nassau Parl**

Naussaische Parlamentarier. Teil 1: Der Landtag des Herzogtums Nassau 1818-1866. Bearb. v. Cornelia Rösner. Wiesbaden 1997. Teil 2: Der Kommunal-landtag des Regierungsbezirks Wiesbaden 1868-1933. Bearb. v. Barbara Burkardt und Manfred Pult. Wiesbaden 2003.

### **NDB**

Neue Deutsche Biographie. Hrsg. von der Historischen Kommission bei der Bayerischen Akademie der Wissenschaften. Berlin 1953 ff.

### **Nekrologe Industrie**

Nekrologe aus dem rheinisch-westfälischen Industriegebiet. Jg. 1939-1951. Bearb. v. Fritz Pudor. [Forts. unter dem Titel: Lebensbilder aus dem rheinisch-westfälischen Industriegebiet] Düsseldorf 1955.

### **Neuer Nehr**

Neuer Nekrolog der Deutschen. Hrsg. v. August Schmidt und Bernhard Friedrich Voigt. 30 Bde., Ilmenau 1824-56.

### **Neumann**

Ostschlesische Porträts. Biographisch-bibliographisches Lexikon von Österreich-Ostschlesien. Bearb. v. Karl Walter Neumann. Teil 1: A-D = Schriften der Stiftung Haus Oberschlesien. Landeskundliche Reihe. Bd. 2,1. Berlin 1991.

### **NGroveD**

The New Grove Dictionary of Music and Musicians. 2. Ausgabe. Hrsg. v. Stanley Sadie. 29 Bde., London 2001.

### **NGroveD Jazz**

The New Grove Dictionary of Jazz. Hrsg. v. Barry Kernfeld. New York 1994.

### **Niederrhein Unternehmer**

Wolfgang Burkhard: Niederrheinische Unternehmer. Duisburg 1990.

### **Nietzsche**

Hauke Reich: Nietzsche-Zeitgenossenlexikon. Verwandte und Vorfahren, Freunde und Feinde, Verehrer und Kritiker von Friedrich Nietzsche. Basel 2004.

### **Nikel**

Politiker der Bundesrepublik Deutschland. Persönlichkeiten des politischen Lebens seit 1949 von A bis Z. Hrsg. v. Ulrike Nickel. Düsseldorf 1985.

### **NÖB**

Neue Österreichische Biographie 1815-1918. [ab Bd. 9: Neue Österreichische Biographie ab 1815. Bd. 10-14: Große Österreicher] 22 Bde., Wien 1923-87.

### **Oberpräis Pommern**

Hans Branig: Die Oberpräsidenten der Provinz Pommern. In: Baltische Studien (1959).

### **Oberschlesier**

Herbert Gross: Bedeutende Oberschlesier. Dülmen 1995.

### **Obertribunal**

Friedrich Hermann Sonnenschmidt: Geschichte des Königlichen Ober-Tribunals zu Berlin. Berlin 1879.

### **ÖBL**

Österreichisches biographisches Lexikon 1815 bis 1950. Hrsg. von der Österreichischen Akademie der Wissenschaften. Graz/Köln, später Wien 1957 ff.

## Verzeichnis der abgekürzt zitierten Literatur

---

### **Ökonomen**

Ökonomenlexikon. Hrsg. v. Werner Krause u.a. Berlin (DDR) 1989.

### **ÖML**

Österreichisches Musiklexikon. Hrsg. v. Rudolf Flotzinger. 5 Bde., Wien 2002-06.

### **Öst Natur a)**

Österreichische Naturforscher und Techniker. Wien 1951.

### **Öst Natur b)**

Österreichische Naturforscher, Ärzte und Techniker. Hrsg. v. Fritz Knoll. Wien 1957.

### **Oldenburg**

Biographisches Handbuch zur Geschichte des Landes Oldenburg. Hrsg. v. Hans Friedl u.a. Oldenburg 1992.

### **Olpp**

Gottlieb Olpp: Hervorragende Tropenärzte in Wort und Bild. München 1932.

### **Orpheus im Exil**

Walter Pass/Gerhard Scheit/Wilhelm Svoboda: Orpheus im Exil. Die Vertreibung der österreichischen Musik von 1938 bis 1945. Wien 1995.

### **Oschilewski**

Berühmte Deutsche in Berlin. Hrsg. v. Walther G. Oschilewski. Berlin 1965.

### **Osnabrück**

Biographisches Handbuch zur Geschichte der Region Osnabrück. Bearb. v. Rainer Hehemann. Bramsche 1990.

### **Osterroth**

Franz Osterroth: Biographisches Lexikon des Sozialismus. Bd. 1: Verstorbene Persönlichkeiten. [Mehr nicht erschienen] Hannover 1960.

### **Ostfriesland**

Biographisches Lexikon für Ostfriesland. Hrsg. v. Martin Tielke. Aurich 1993 ff.

### **Pädagoginnen**

Mütterlichkeit als Profession? Lebensläufe deutscher Pädagoginnen in der ersten Hälfte dieses Jahrhunderts. Bd. 1. Hrsg. v. Ilse Brehmer. Bd. 2: Kurzbiographien. Hrsg. v. Ilse Brehmer und Karin Ehrlich. Pfaffenweiler 1990-93.

### **Päd Lex**

Pädagogisches Lexikon. Hrsg. v. Hermann Schwartz. 4 Bde., Bielefeld/Leipzig 1928-31.

### **Passau**

Franz Mader: Tausend Passauer. Biographisches Lexikon zu Passaus Stadtgeschichte. Passau 1995.

### **Patzak**

Bernhard Patzak: Die Jesuitenbauten in Breslau und ihre Architekten. Ein Beitrag zur Geschichte des Barockstiles in Deutschland. Straßburg 1918.

### **Perlick**

Alfons Perlick: Oberschlesische Berg- und Hüttenleute. Lebensbilder aus dem oberschlesischen Industriegebiet. Kitzingen/Main 1953.

### **Pers Europa**

Persönlichkeiten Europas. Deutschland I. Stuttgart/Luzern 1976.

### **Pfälzer Pers**

Viktor Carl: Lexikon Pfälzer Persönlichkeiten. 3., überarb. und erw. Aufl. Edenkoben 2004.

### **Pfau 1**

Karl Friedrich Pfau: Biographisches Lexikon des Deutschen Buchhandels der Gegenwart. Unter Berücksichtigung der hervorragenden Vertreter des Buchgewerbes der alten Zeit und des Auslandes. Leipzig 1890.

### **Pfau 2**

Karl Friedrich Pfau: Das Buch berühmter Buchhändler. 2 Bde., Leipzig 1885/86.

### **Philobiblon**

Philobiblon. Eine Viertelsjahrsschrift für Buch- und Graphiksammler 1 ff. (1957 ff.).

### **Piazza**

Berühmte Leipziger Studenten. Hrsg. v. Hans Piazza. Leipzig/Jena/Berlin 1984.

### **Pietismus**

Geschichte des Pietismus. Hrsg. v. Martin Brecht u.a. 4 Bde. Göttingen 1993-2004.

### **Poggendorff**

Johann Christian Poggendorff: Biographisch-literarisches Handwörterbuch zur Geschichte der exacten Wissenschaften. Bd. 1-2. Leipzig 1863. Bd. 3: 1858-1883. Teil 1-2. Hrsg. v. Berend Wilhelm Feddersen und Arthur Joachim von Oettingen. Leipzig 1898. Bd. 4: 1883-1904. Teil 1-2. Hrsg. v. Arthur Joachim v. Oettingen. Leipzig 1904. Bd. 5: 1904-1922. Teil 1-2. Red. v. Paul Weinmeister. Leipzig 1926. Bd. 6: 1923-1931, Teil 1-4. Red. v. Hans Stobbe. Leipzig 1936-40. Bd. 7a: 1932-53. Teil 1-4. Red. v. Rudolph Zaunick und Hans Salié. Berlin 1956-62. Bd. 7b: 1932-62. Teil 1-7. Leitung der Redaktion Hans Salié. Berlin 1967-85. Bd. 8. Teil 1-3. Leitung der Redaktion Margot Köstler. Berlin 1995-2004.

### **Pollak**

Tausend Jahre Österreich. Eine biographische Chronik. Hrsg. v. Walter Pollak. Bd. 1: Von den Babenberger bis zum Wiener Kongreß. Bd. 2: Vom Biedermeier bis zur Gründung d. modernen Parteien. Bd. 3: Der Parlamentarismus und die beiden Republiken. Wien/München 1973/74.

### **Preuß Oberprä**

Die preußischen Oberpräsidenten 1815-1945. Hrsg. v. Klaus Schwabe. Boppard/Rhein 1985.

### **Preuß Staatsmin**

Die Protokolle des Preußischen Staatsministeriums 1817-1934/38. Hrsg. von der Berlin-Brandenburgischen Akademie der Wissenschaften unter der Leitung von Jürgen Kocka und Wolfgang Neugebauer. 12 Bde., Hildesheim u.a. 1999-2004.

### **Priesdorff**

Kurt Priesdorff: Soldatisches Führertum. 10 Bde., Hamburg 1937-42.

### **Prof Basel**

Professoren der Universität Basel aus fünf Jahrhunderten. Bildnisse und Würdigungen. Hrsg. v. Andreas Staehelin. Basel 1960.

### **Proffitt**

Pamela Proffitt (Hrsg.): Notable Women Scientists. Detroit u.a. 1999.

### **Profile**

Profile des neuzeitlichen Protestantismus. 2 Bde. in 3 Teilen. Hrsg. v. Friedrich Wilhelm Graf. Gütersloh 1990-93.



## Verzeichnis der abgekürzt zitierten Literatur

### Profile Luthertum

Profile des Luthertums. Biografien zum 20. Jahrhundert. Hrsg. v. Wolf-Dieter Hauschild. Gütersloh 1998.

### Psychologie

Psychologie in Selbstdarstellungen. Hrsg. v. Ludwig J. Pongratz, Werner Traxel und Ernst G. Wehner. 4 Bde., Bern u. a. [Bd. 4: Lengerich u. a.] 1972-2004.

### Psychotherapie

Personenlexikon der Psychotherapie. Hrsg. v. Gerhard Stumm, Alfred Pritz, Paul Gumhalter, Nora Nemeskeri und Martin Voracek. Wien 2005.

### Publizistik

Publizistik. Vierteljahrshefte für Kommunikationsforschung 1 ff. (1956 ff.).

### Puschner

Uwe Puschner/Walter Schmitz/Justus H. Ulbricht (Hrsg.): Handbuch zur „Völkischen Bewegung“ 1871-1918. München 1996.

### Quäker

Claus Bernet: Quäker aus Politik, Wissenschaft und Kunst. 20. Jahrhundert. Ein biographisches Lexikon. Nordhausen 2007.

### Raabe

Paul Raabe: Die Autoren und Bücher des literarischen Expressionismus. Ein bibliographisches Handbuch. Stuttgart 1985.

### Rabbiner

Biographisches Handbuch der Rabbiner. Hrsg. v. Michael Brocke und Julius Carlebach. Teil 1. Bd. 1-2. München 2004.

### Raberg

Biographisches Handbuch der württembergischen Landtagsabgeordneten 1815-1933. Im Auftrag der Kommission für geschichtliche Landeskunde in Baden-Württemberg bearb. v. Frank Raberg. Stuttgart 2001.

### Rattner

Josef Rattner: Große Pädagogen. 2., erweit. Aufl. München/Basel 1968.

### RE

Real-Encyclopädie für protestantische Theologie und Kirche. Begründet v. Johann Jakob Herzog. 3. Aufl., hrsg. v. Albert Hauck. 24 Bde., Leipzig 1896-1913.

### Reber

Burkard Reber: Galerie hervorragender Therapeutiker und Pharmakognosten der Gegenwart. Genf 1897.

### Recktenwald

Geschichte der politischen Ökonomie. Eine Einführung in Lebensbildern. Hrsg. v. Horst Claus Recktenwald. Stuttgart 1971.

### Refardt

Edgar Refardt: Historisch-biographisches Musikerlexikon der Schweiz. Leipzig/Zürich 1928.

### Regensburg

Berühmte Regensburger. Lebensbilder aus zwei Jahrzehnten. Hrsg. v. Karlheinz Dietz und Gerhard H. Waldherr. Regensburg 1997.

### RegPräs Obb

Regierungspräsidenten von Oberbayern im 19. und 20. Jahrhundert. Hrsg. v. Stephan Deutinger, Karl-Ulrich Gelberg und Michael Stephan. München 2005.

### Reichshandbuch

Reichshandbuch der deutschen Gesellschaft. Das Handbuch der Persönlichkeiten in Wort und Bild. 2 Bde., Berlin 1930/31.

### Reinalter

Biographisches Lexikon zur Geschichte der demokratischen und liberalen Bewegungen in Mitteleuropa. Bd. 1: 1770-1800. Hrsg. v. Helmut Reinalter, Axel Kuhn und Alin Ruiz. Frankfurt/Main u. a. 1992. Bd. 2.1. Hrsg. v. Helmut Reinalter. Frankfurt/Main u. a. 2005.

### Rektoren Rostock

Die Rektoren der Universität Rostock 1419-2000. Hrsg. v. Angela Hartwig und Tilmann Schmidt. Rostock 2000.

### Renkhoff

Otto Renkhoff: Nassauische Biographie. Kurzbiographien aus 13 Jahrhunderten. 2., vollst. überarb. und erweit. Aufl. = Veröffentlichungen der Historischen Kommission für Nassau. Bd. 39. Wiesbaden 1992.

### RGa

Realexikon der Germanischen Altertumskunde. Begr. v. Johannes Hoops. Hrsg. v. Heinrich Beck, Dieter Geuenich und Heiko Steuer. 2., vollst. neubearb. und stark erw. Aufl. 35 Bde. und 2 Registerbände. Berlin/New York 1973-2008.

### RGG

Die Religion in Geschichte und Gegenwart. Handwörterbuch für Theologie und Religionswissenschaft. 3., völlig neu bearb. Aufl. Hrsg. v. Kurt Galling in Gemeinschaft mit Hans Frh. von Campenhausen, Erich Dinkler, Gerhard Gloege und Knud E. Løgstrup. 6 Bde., Registerband. Tübingen 1957-65. Religion in Geschichte und Gegenwart. 4., völlig neu bearb. Aufl. Hrsg. v. Hans Dieter Betz, Don S. Browning, Bernd Janowski und Eberhard Jüngel. 8 Bde., Tübingen 1998-2005.

### Rhein-Westf Wirt

Rheinisch-Westfälische Wirtschaftsbiographien. Münster 1931/32 ff.

### Richarz

Bürger auf Widerruf. Lebenszeugnisse deutscher Juden 1780-1945. Hrsg. v. Monika Richarz. München 1989.

### Ridder

Bernhard Ridder: Männer des Kolpingwerkes. Lebensbilder aus der hundertjährigen Geschichte des Kolpingwerkes. Köln 1955.

### Roeseler

Albrecht Roeseler: Große Geiger unseres Jahrhunderts. München/Zürich 1987.

### Rößler/Franz

Biographisches Wörterbuch zur deutschen Geschichte. Begr. v. Hellmuth Rössler und Günther Franz. 2., völlig neu bearb. und stark erw. Aufl. Bearb. v. Karl Bosl, Günther Franz und Hanns Hubert Kaufmann. 3 Bde., München 1973-75, Nachdr. 1995.

### Rötger

Nekrolog für Freunde deutscher Literatur. Hrsg. v. Gottlieb Sebastian Rötger. 4 Bde., Helmstedt 1796-99.

### Romanisten

Deutsche und österreichische Romanisten als Verfolgte des Nationalsozialismus. Hrsg. v. Hans Helmut Christmann und Frank-Rutger Hausmann Bd. 10. Tübingen 1989.

### Romeyk

Horst Romeyk: Die leitenden staatlichen und kommunalen Verwaltungsbeamten der Rheinprovinz 1816-1945. Düsseldorf 1994.

## Verzeichnis der abgekürzt zitierten Literatur

---

### **Rubner**

Heinrich Rubner: Hundert bedeutende Forstleute Bayerns (1875 bis 1970). München 1994 (Mitteilungen aus der Staatsforstverwaltung Bayern, 47).

### **Sächs Biogr**

Sächsische Biografie. Hrsg. vom Institut für Sächsische Geschichte und Volkskunde e.V. Wissenschaftliche Leitung: Martina Schattkowsky. Online-Ausgabe: <http://www.isgv.de/saebi/>.

### **Sächs Parl**

Sächsische Parlamentarier 1869-1918. Die Abgeordneten der II. Kammer des Königreichs Sachsen im Spiegel historischer Photographien. Ein biographisches Handbuch. Bearb. v. Elvira Döscher und Wolfgang Schröder. Düsseldorf 2001.

### **Sarkowicz**

Hans Sarkowicz/ Alf Mentzer: Literatur in Nazi-Deutschland. Ein biografisches Lexikon. Erweiterte Neuauflage. Hamburg/Wien 2002.

### **Saube**

Emil Saube: Deutsche Pädagogen der Neuzeit. Ein Beitrag zur Geschichte der Erziehungswissenschaft zu Beginn des 20. Jahrhunderts. 5. und 6. Aufl. Osterwieck 1927.

### **SBZ/DDR**

Biographisches Handbuch SBZ/DDR 1945-1990. Hrsg. v. Gabriele Baumgartner und Dieter Hebig. 2 Bde., München u. a. 1996/97.

### **Schäfer**

Karl T. Schäfer: Verfassungsgeschichte der Universität Bonn 1818 bis 1960. Bonn 1968.

### **Schärl**

Walter Schärl: Die Zusammensetzung der bayerischen Beamtenschaft von 1806 bis 1918. Kallmünz 1955.

### **Schaffhauser Biogr**

Schaffhauser Biographien des 18. und 19. Jahrhunderts (ab Bd. 5: Schaffhauser Biographien). Hrsg. v. Historischen Verein des Kantons Schaffhausen. Thayngen 1956 ff.

### **Schein**

Christen zwischen Niederrhein und Eifel. Lebensbilder aus zwei Jahrhunderten. Hrsg. v. Karl Schein. 3 Bde., Aachen/Mönchengladbach 1993.

### **Schlesische Kirche**

Schlesische Kirche in Lebensbildern. Hrsg. v. Johannes Gröger, Joachim Köhler und Werner Marschall. Sigmaringen 1992.

### **Schlichtegroll 1**

Friedrich Schlichtegroll: Nekrolog auf das Jahr ... 1.-11. Jg. Gotha 1791-1806.

### **Schlichtegroll 2**

Nekrolog der Teutschen für das 19. Jahrhundert. Hrsg. v. Friedrich Schlichtegroll. 5 Bde., Gotha 1802-06.

### **Schmaling**

Paul Schmaling: Künstlerlexikon Hessen-Kassel 1777-2000. Mit den Malerkolonien Willinghausen und Kleinsassen. Kassel 2001.

### **Schmersahl**

Elias Friedrich Schmersahl: Geschichte jetzt lebender Gottesgelehrten. 1 Band in 8 Stücken. Langensalza 1751-55.

### **Schmidt**

Ernst Wilhelm Schmidt: Männer der Deutschen Bank und der Disconto-Gesellschaft. Düsseldorf 1957.

### **Schmidt-Liebich**

Jochen Schmidt-Liebich: Lexikon der Künstlerinnen 1700-1900. Deutschland, Österreich, Schweiz. München 2005.

### **Schmitz**

Siegfried Schmitz: Große Entdecker und Forschungsreisende. Eine Geschichte der Weltentdeckung von der Antike bis zum 20. Jahrhundert in Biographien. Düsseldorf 1983.

### **Schmöckel**

Die Juristen der Universität Bonn im „Dritten Reich“. Hrsg. v. Mathias Schmöckel. Köln u. a. 2004.

### **Schmolke**

Michael Schmolke (Hrsg.): Wegbereiter der Publizistik in Österreich. Wien/St. Johann (Pongau) 1992.

### **Scholder**

Protestantische Profile. Lebensbilder aus fünf Jahrhunderten. Hrsg. v. Klaus Scholder und Dieter Kleinmann. Königstein/Taunus 1983.

### **Scholz**

Ärzte in Ost- und Westpreußen. Leben und Leistung seit dem 18. Jahrhundert. Hrsg. v. Harry Scholz und Paul Schroeder = Ostdeutsche Beiträge aus dem Göttinger Arbeitskreis. Bd. 48. Würzburg 1970.

### **Schröder**

Wilhelm Heinz Schröder: Sozialdemokratische Parlamentarier in den deutschen Reichs- und Landtagen 1867-1933. Biographien – Chronik – Wahldokumentation. Ein Handbuch. Düsseldorf 1995.

### **Schütz**

Hans J. Schütz: „Ein deutscher Dichter bin ich einst gewesen“. Vergessene und verkannte Autoren des 20. Jahrhunderts. München 1988.

### **Schulte**

Wilhelm Schulte: Westfälische Köpfe: 300 Lebensbilder bedeutender Westfalen. Biographischer Wegweiser. Münster 1963.

### **Schultheß**

Schweizer Juristen der letzten hundert Jahre. Hrsg. v. Hans Schultheß. Zürich 1945.

### **Schulz**

Große Berliner aus dem Osten. Bearb. v. Wolfgang Schulz und Gisela Höhle. Berlin 1987.

### **Schweiz Bundesräte**

Die Schweizer Bundesräte. Ein biographisches Lexikon. Hrsg. v. Urs Allematt. Zürich u. a. 1991.

### **Schweiz Komp**

40 Schweizer Komponisten der Gegenwart. Amriswil 1956.

### **Schweiz Kunst**

Biografisches Lexikon der Schweizer Kunst. Unter Ein-schluss des Fürstentums Liechtenstein. Hrsg. vom Schweizerischen Institut für Kunstwissenschaft Zürich und Lausanne. 2 Bde., Zürich 1998.

### **Schweiz Theater**

Theaterlexikon der Schweiz. Hrsg. v. Andreas Kotte. 3 Bde., Zürich 2005.

### **Schweizer Pioniere**

Schweizer Pioniere der Wirtschaft und Technik. Hrsg. vom Verein für wirtschaftshistorische Studien. 81 Bde., Zürich, ab Bd. 47 Meilen 1955-2005.

## Verzeichnis der abgekürzt zitierten Literatur

### Seidler

Eduard Seidler: Kinderärzte 1933-1945. Entrechtet – geflohen – ermordet. Bonn 2000. Erw. Neuaufl. u. d. T. Jüdische Kinderärzte 1933-1945. Entrechtet – geflohen – ermordet. Basel u. a. 2007.

### Seiters

Porträts christlich-sozialer Persönlichkeiten. Teil 1: Die Katholiken und die deutsche Sozialgesetzgebung. Hrsg. v. Julius Seiters. Osnabrück 1965.

### Serlo

Walter Serlo: Westdeutsche Berg- und Hüttenleute und ihre Familien. Essen 1938.

### SHBL

Schleswig-Holsteinisches Biographisches Lexikon. Hrsg. v. Olaf Klose. Bd. 1-5. Neumünster 1970-79. Fortges. unter dem Titel: Biographisches Lexikon für Schleswig-Holstein und Lübeck. Neumünster 1982 ff.

### Siebenbürger Schriftst

Schriftsteller-Lexikon der Siebenbürger Deutschen. Bio-Bibliographisches Handbuch für Wissenschaft, Dichtung und Publizistik. Begr. v. Joseph Trausch, fortgeführt v. Friedrich Schuller und Hermann Adolf Hienz. Köln u. a. 1995 ff.

### Siebert

Karl Siebert: Hanauer Biographien aus drei Jahrhunderten. Hanau 1919.

### Siemens

Ernst Feldtkeller/Herbert Goetzeler (Hrsg.): Pioniere der Wissenschaft bei Siemens. Beruflicher Werdegang und wichtigste Ergebnisse. Erlangen 1994.

### Sigerist

Henry E. Sigerist: Große Ärzte. Eine Geschichte der Heilkunde in Lebensbildern. 2., verm. Aufl. München 1931.

### Sinzheimer

Hugo Sinzheimer: Jüdische Klassiker der deutschen Rechtswissenschaft. Amsterdam 1938.

### Sitt

Kunsthistoriker in eigener Sache. Zehn autobiographische Skizzen. Hrsg. v. Martina Sitt. Berlin 1990.

### Slapnicka

Harry Slapnicka: Oberösterreich – Die politische Führungsschicht. 1918 bis 1938. Linz 1976.

### Smelser

Ronald Smelser/Enrico Syring (Hrsg.): Die SS: Elite unter dem Totenkopf. 30 Lebensläufe. 2., durchgesehene und aktualisierte Aufl. Paderborn u. a. 2003.

### Smend

Rudolf Smend: Deutsche Alttestamentler in drei Jahrhunderten. Göttingen 1989.

### Soukup

R. Werner Soukup (Hrsg.): Die wissenschaftliche Welt von gestern. Die Preisträger des Ignaz L. Lieben-Preises 1865-1937 und des Richard Lieben-Preises 1912-1928. Ein Kapitel österreichischer Wissenschaftsgeschichte in Kurzbiografien. Wien u. a. 2004.

### Spalek

Deutsche Exilliteratur seit 1933. Bd. 1 in 2 Teilbänden: Kalifornien. Hrsg. v. John M. Spalek und Joseph Strelka. Bern 1976. Deutschsprachige Exilliteratur seit 1933. Bd. 2 in zwei Teilbänden: New York. Hrsg. v. John M. Spalek und Joseph Strelka. Bern 1989. Bd. 3 in 5 Teilbänden: USA. Hrsg. v. John M. Spalek, Konrad Feilchenfeldt, Sandra H. Hawrylychak. Bern/München 2000-05. Bd. 4 in 3 Teilbänden: Bibliographien: Schriftsteller, Publizisten und Literaturwissenschaftler in den USA. Bern/München 1994.

### Spenkuch

Hartwin Spenkuch: Das Preußische Herrenhaus. Adel und Bürgertum in der Ersten Kammer des Landtages 1854-1918. Düsseldorf 1998.

### Stadler

Friedrich Stadler: Studien zum Wiener Kreis. Ursprung, Entwicklung und Wirkung des logischen Empirismus im Kontext. Frankfurt/Main 1997

### Stadtlex Augsburg

Augsburger Stadtlexikon. 2., völlig neu bearb. und erheblich erw. Aufl. Hrsg. v. Günther Grünstedel, Günter Hägele und Rudolf Frankenberger. Augsburg 1998.

### Stadtlex Dresden

Folke Stimmel/Reinhardt Eigenwill/Heinz Glodschei/Wilfrid Hahn/Eberhard Stimmel/Rainer Tittmann: Stadtlexikon Dresden A-Z. 2., überarb. Aufl. Dresden 1998.

### Stadtlex Erlangen

Erlanger Stadtlexikon. Hrsg. v. Christoph Friedrich, Bertold Frh. v. Haller und Andreas Jakob. Nürnberg 2002.

### Stadtlex Nürnberg

Stadtlexikon Nürnberg. Hrsg. v. Michael Diefenbacher und Rudolf Endres. 2., verb. Aufl. Nürnberg 2000.

### Stiglat

Klaus Stiglat: Bauingenieure und ihr Werk. Berlin 2004.

### StL

Staatslexikon. Recht, Wirtschaft, Gesellschaft. Hrsg. von der Görres-Gesellschaft. 7 Bde., Freiburg/Breisgau 1985-93.

### Stolleis

Michael Stolleis: Juristen. Ein biographisches Lexikon. München 1995.

### Stolz

Rüdiger Stolz: Naturforscher in Mitteldeutschland. Bd. 1: Thüringen. Jena 2003.

### Streitb Jur

Streitbare Juristen. Eine andere Tradition. Jürgen Seifert, Mithrsg. der Kritischen Justiz, zum 60. Geburtstag. Baden-Baden 1988.

### Strieder

Friedrich Wilhelm Strieder: Grundlage zu einer Hessischen Gelehrten- und Schriftstellergeschichte. 20 Bde., Kassel 1780-1863.

### Sturlese

Loris Sturlese: Die deutsche Philosophie im Mittelalter. München 1993.

### Sucher

Theaterlexikon. Autoren, Regisseure, Schauspieler, Dramaturgen, Bühnenbildner, Kritiker. Hrsg. v. C. Bernd Sucher. Von Christine Dössel und Marietta Piekenbrock unter Mitwirkung v. Jean-Claude Kuner und C. Bernd Sucher. Völlig neu bearb. und erw. 2. Aufl. München 1999.

## Verzeichnis der abgekürzt zitierten Literatur

---

### **Sutter**

Rottraut Sutter: Siebenbürger Sachsen in Österreichs Vergangenheit und Gegenwart. Eine Auswahl. Innsbruck 1976.

### **Taube**

Deutsche Männer des baltischen Ostens. Hrsg. v. Arved von Taube. Berlin 1943.

### **TBL**

Trierer Biographisches Lexikon. Gesamtbearbeitung: Heinz Monz. Koblenz 2000.

### **Techniker**

Biographien bedeutender Techniker, Ingenieure und Technikwissenschaftler. Eine Sammlung von Biographien. Hrsg. v. Gerhard Banse und Siegfried Wollgast. Berlin 1983.

### **Th-B**

Allgemeines Lexikon der bildenden Künstler von der Antike bis zur Gegenwart. Hrsg. v. Ulrich Thieme und Felix Becker. 37 Bde., Leipzig 1907-50.

### **Thüringen**

Thüringen-Handbuch. Territorium, Verfassung, Parlament, Regierung und Verwaltung in Thüringen 1920 bis 1995. Hrsg. v. Bernhard Post und Volker Wahl. Weimar 1999.

### **Tirol**

Gertrud Pfaundler-Spat: Tirol-Lexikon. Ein Nachschlagewerk über Menschen und Orte des Bundeslandes Tirol. Vollst. überarb. und erg. Neuauf. Innsbruck u. a. 2005.

### **Traber**

Verdrängte Musik. Berliner Komponisten im Exil. Hrsg. v. Habakuk Traber und Elmar Weingarten. Berlin 1987.

### **Trausch**

Joseph Trausch: Schriftsteller-Lexikon oder biographisch-literarische Denkbücher der Siebenbürger Deutschen. Bd. 1-3. Hermannstadt 1868-71. Bd. 4: Friedrich Schuller: Schriftstellerlexikon der Siebenbürger Deutschen. Hermannstadt 1902. Nachdr. Kronstadt 1983.

### **TRE**

Theologische Realenzyklopädie. Hrsg. v. Gerhard Krause (bis Bd. 12) und Gerhard Müller in Gemeinschaft mit Horst Balz u. a. 36 Bde., Berlin/New York 1977-2005.

### **Tremel**

Geschichte und Kultur der Juden in Bayern. Lebensläufe. Hrsg. v. Manfred Tremel und Wolf Weigand. München 1988.

### **Trier, 20. Jh.**

Emil Zenz: Die Stadt Trier im 20. Jahrhundert. 1. Hälfte 1900-1950. Trier 1981.

### **Ueberschär**

Hitlers militärische Elite. Hrsg. v. Gerd R. Ueberschär. 2 Bde., Darmstadt 1998.

### **Ufa**

Friedemann Beyer: Die Gesichter der Ufa. Starportraits einer Epoche. München 1992.

### **Unionsparl**

Jochen Lengemann: Das Deutsche Parlament (Erfurter Parlament) von 1850. Ein Handbuch: Mitglieder, Amtsträger, Lebensdaten, Fraktionen. München/Jena 2000.

### **Univ Stuttgart**

Die Universität Stuttgart nach 1945. Geschichte, Entwicklungen, Persönlichkeiten. Hrsg. v. Norbert Becker. Ostfildern 2004.

### **Unternehmer**

Biographien bedeutender Unternehmer. Eine Sammlung von Biographien. Hrsg. v. Gisela Buchheim und Wolf D. Hartmann. Berlin 1991.

### **Unverricht**

Musik und Musiker am Mittelrhein. Ein biographisches, orts- und landesgeschichtliches Nachschlagewerk. Hrsg. v. Hubert Unverricht. Bd. 1.2 = Beiträge zur mittelrheinischen Musikgeschichte. Nr. 20.21. Mainz 1974-81.

### **Urban**

Josef Urban (Hrsg.): Die Bamberger Erzbischöfe. Lebensbilder. Bamberg 1997.

### **Utop phantast Lit**

Bibliographisches Lexikon der utopisch phantastischen Literatur. Hrsg. v. Joachim Körber. Meitingen 1984 ff.

### **VD 16**

Verzeichnis der im deutschen Sprachbereich erschienenen Drucke des XVI. Jahrhunderts. Hrsg. von der Bayerischen Staatsbibliothek in München in Verbindung mit der Herzog-August-Bibliothek in Wolfenbüttel. Redaktion: Irmgard Bezzel. Stuttgart 1983 ff.

### **Verwaltung**

Persönlichkeiten der Verwaltung. Biographien zur deutschen Verwaltungsgeschichte 1648-1945. Hrsg. v. Kurt G.H. Jeserich und Helmut Neuhaus. Stuttgart u. a. 1991.

### **VL**

Die deutsche Literatur des Mittelalters. Verfasserlexikon. Begr. v. Wolfgang Stammer. Fortgeführt v. Karl Langosch. 2., völlig neu bearb. Aufl. Hrsg. v. Kurt Ruh zusammen mit Gundolf Keil, Werner Schröder, Burghart Wachinger und Franz Josef Worstbrock. Ab Bd. 9 hrsg. v. Burghart Wachinger. 11 Bde., Berlin/New York 1978-2004.

### **Vollmer**

Hans Vollmer: Allgemeines Lexikon der bildenden Künstler des 20. Jahrhunderts. 5 Bde., Leipzig 1953-61.

### **Vorbilder**

Vorbilder aus der deutschen Geschichte. München 1983.

### **Waetzoldt**

Wilhelm Waetzoldt: Deutsche Kunsthistoriker. 2 Bde., Leipzig 1921-24.

### **Wagner**

Renate Wagner: Heimat bist du großer Töchter. Österreicherinnen im Laufe der Jahrhunderte. Wien 1992.

### **Wall 1**

Renate Wall: Verbrannt, verboten, vergessen. Kleines Lexikon deutschsprachiger Schriftstellerinnen 1933-45. Köln 1988.

### **Wall 2**

Renate Wall: Lexikon deutschsprachiger Schriftstellerinnen im Exil 1933-1945. 2 Bde., Freiburg/Breisgau 1995.

### **Weber**

Wolfgang Weber: Biographisches Lexikon zur Geschichtswissenschaft in Deutschland, Österreich und der Schweiz. Die Lehrstuhlinhaber für Geschichte von den Anfängen des Faches bis 1970. 2. Aufl. Frankfurt/Main u. a. 1987.

## Verzeichnis der abgekürzt zitierten Literatur

### Weber-Reich

„Des Kennenlernens werth“. Bedeutende Frauen Göttingens. Hrsg. v. Traudel Weber-Reich. Göttingen <sup>3</sup>1995.

### Wegmann

Dietrich Wegmann: Die leitenden staatlichen Verwaltungsbeamten der Provinz Westfalen 1815-1918. Münster/Westfalen 1969.

### Weiland

Daniela Weiland: Geschichte der Frauenemanzipation in Deutschland und Österreich. Düsseldorf 1983.

### Weinkultur

Paul Claus: Persönlichkeiten der Weinkultur deutscher Sprache und Herkunft. Kurz-Biographien aus 16 Jahrhunderten. München u. a. 1991.

### Weiß

Hermann Weiß (Hrsg.): Biographisches Lexikon zum Dritten Reich. Frankfurt/Main 1998. Überarb. Neuauflage. Frankfurt/Main 2002.

### Wendland

Ulrike Wendland: Biographisches Handbuch deutschsprachiger Kunsthistoriker im Exil. Leben und Werk der unter dem Nationalsozialismus verfolgten und vertriebenen Wissenschaftler. 2 Teile. München 1999.

### Wer ist wer?

Wer ist wer? Das deutsche Who's who. Hrsg. v. Walter Habel ... Ausgabe von Degeners Wer ist's? [ab 24. Ausgabe; Begr. v. Walter Habel. (vormals Degeners Wer ist's?)]. Berlin 1951 ff.

### Werke

Sie leben fort in ihren Werken. Lebensbilder großer Deutscher. Stuttgart 1963.

### Werner

Sie kämpfen und starben für kommendes Recht. Kurze Lebensbeschreibungen Dresdner Arbeiterfunktionäre und Widerstandskämpfer. Hrsg. v. Alfred Werner = Beiträge zur Geschichte der Dresdner Arbeiterbewegung. H. 10. Dresden 1963.

### Westf Autoren

Westfälisches Autorenlexikon. Im Auftrag des Landschaftsverbandes Westfalen-Lippe hrsg. und bearb. v. Walter Gödden und Iris Nölle-Hornkamp unter Mitarbeit v. Henrike Gundlach u. a. Bd. 1: 1750 bis 1800. Bd. 2: 1800-1850. Bd. 3: 1850-1900. Bd. 4: 1900-1950. Paderborn 1993-2002.

### Westf Parl

Die Abgeordneten des Westfalenparlaments 1826-1978. Zusammenestellt von Josef Häming. Eingeleitet und hrsg. v. Alfred Bruns. Münster 1978 (Landschaftsverband Westfalen-Lippe, Westfälische Quellen und Archivverzeichnisse, Bd 2). Nachtrag 1983. Bearb. v. Josef Häming. Hrsg. v. Alfred Bruns. Münster 1984 (Landschaftsverband Westfalen-Lippe, Westfälische Quellen und Archivverzeichnisse, Bd 2).

### Wetzer / Welte

Wetzer und Welte's Kirchenlexikon oder Encyclopädie der katholischen Theologie und ihrer Hilfswissenschaften. 2. Aufl. in neuer Bearb. ... begonnen v. Joseph Hergenröther, fortgesetzt v. Franz Kaulen. 12 Bde., Registerband, Freiburg/Breisgau 1882-1903.

### Widerstand

Lexikon des Widerstands 1933-1945. Hrsg. v. Peter Steinbach und Johannes Tuchel. München <sup>2</sup>1998.

### Wieacker

Franz Wieacker: Gründer und Bewahrer. Rechtslehrer der neueren deutschen Privatrechtsgeschichte. Göttingen 1959.

### Wieninger

Karl Wieninger: Bayerische Gestalten. 74 Lebensbilder von Herzog Tassilo III. bis Werner Heisenberg. München 1981.

### Wienstein: Kath

Friedrich Wienstein: Lexikon der katholischen deutschen Dichter vom Ausgange des Mittelalters bis zur Gegenwart. Hamm 1899.

### Wienstein: Päd

Friedrich Wienstein: Preußische Pädagogen der Neuzeit. Dreißig Charakterbilder als Beitrag zur Schulgeschichte. Arnberg 1900.

### Wiggenhauser

Béatrice Wiggenhauser: Klerikale Karrieren. Das ländliche Chorherrenstift Embrach und seine Mitglieder im Mittelalter. Zürich 1997.

### Wildt

Michael Wildt: Generation des Unbedingten. Das Führungskorps des Reichssicherheitshauptamtes. Hamburg 2002.

### Wilhelmy

Petra Wilhelmy: Der Berliner Salon im 19. Jahrhundert (1780-1914). Berlin/New York 1989.

### Wilpert: Goethe

Gero von Wilpert: Goethe-Lexikon. Stuttgart 1998.

### Winger

Salomon Winger: Große jüdische National-Biographie. 7 Bde., Cernăuți 1925-36. Nachdr. Nendeln 1979.

### Wistrich

Robert Wistrich: Wer war wer im Dritten Reich. München 1983.

### Wolandt

Ostdeutsche Denker. Vier Jahrhunderte philosophischer Tradition von Jakob Böhme und Moritz Löwi. Hrsg. v. Gerd Wolandt und Reinhold Breil. Bonn 1992.

### Wolf

Erik Wolf: Große Rechtsdenker der deutschen Geistesgeschichte. 4. Aufl. Tübingen 1963.

### Württ Nekrolog

Württembergischer Nekrolog für das Jahr ... Hrsg. v. Karl Weller und Viktor Ernst. Jg. 1913-1920/21. Sonderheft. Stuttgart 1916-28.

### Wunder

Gerd Wunder: Bauer, Bürger, Edelmann. Lebensläufe. In memoriam Gerd Wunder. Hrsg. v. der Stadt Schwäbisch Hall. Sigmaringen 1988.

### Wuppertal Bio

Wuppertaler Biographien. 17 Folgen, Wuppertal 1958-93.

### Wurm

Ernst Wurm: Die Burgschauspielerinnen. 12 Porträtskizzen. Wien 1969.

### Wurzbach

Constant von Wurzbach: Biographisches Lexikon des Kaiserthums Österreich, enthaltend die Lebensskizzen der denkwürdigen Personen, welche 1750 bis 1850 im Kaiserstaate und in seinen Kronländern gelebt haben. 60 Bde., Wien 1856-91. Nachdr. New York 1966-73.

## Verzeichnis der abgekürzt zitierten Literatur

---

### **Wußing**

Fachlexikon Abc Forscher und Erfinder. Hrsg. v. Hans-Ludwig Wußing. Frankfurt/Main 1992.

### **Zeitgeschichte**

Zeitgeschichte in Lebensbildern. Aus dem Katholizismus des 19. und 20. Jahrhunderts. Hrsg. v. Rudolf Morsey, ab Bd. 3 v. Jürgen Aretz, Rudolf Morsey und Anton Rauscher. Mainz 1973 ff., ab Bd. 9 Münster 1999 ff.

### **Zekert**

Otto Zekert: Berühmte Apotheker. 2 Bde., Stuttgart 1955-62.

### **Zimmerling**

Peter Zimmerling (Hrsg.): Evangelische Seelsorgerinnen. Biografische Skizzen, Texte und Programme. Göttingen 2005.

### **ZSK**

Zeitgenössische schlesische Komponisten. Eine Dokumentation. 2 Bde., Dülmen (Westf.) 1979.

### **Zürcher Ärzte**

Christoph Mörgeli/Bruno Weber: Zürcher Ärzte aus vier Jahrhunderten. Die Porträtgalerie im Medizinhistorischen Museum der Universität Zürich. Hrsg. von der Ärztesgesellschaft des Kantons Zürich. Zollikon 1998.
